1  
2 **Sediment accumulation, elevation change, and the**  
3 **vulnerability of tidal marshes in the Delaware Estuary and**  
4 **Barnegat Bay to accelerated sea level rise**  
5

6 LeeAnn Haaf<sup>1,2\*</sup>, Elizabeth Burke Watson<sup>2</sup>, Tracy Elsey-Quirk<sup>3</sup>, Kirk Raper<sup>2</sup>, Angela Padeletti<sup>1</sup>,  
7 Martha Maxwell-Doyle<sup>4</sup>, Danielle Kreeger<sup>1</sup>, David Velinsky<sup>2</sup>

8 <sup>1</sup> The Partnership for the Delaware Estuary, Wilmington, Delaware, United States of America

9 <sup>2</sup> Department of Biodiversity, Earth & Environmental Sciences and the Academy of Natural  
10 Sciences of Drexel University, Philadelphia, Pennsylvania, United States of America

11 <sup>3</sup> Department of Oceanography and Coastal Sciences, Louisiana State University, Baton Rouge,  
12 Louisiana, United States of America

13 <sup>4</sup> The Barnegat Bay Partnership, Toms River, New Jersey, United States of America

14 \*Corresponding author

15 E-mail: [lhaaf@delawareestuary.org](mailto:lhaaf@delawareestuary.org)

16

17 **Abstract**

18 Tidal marshes protect coastal communities from the effects of sea level rise and storms, yet they  
19 are vulnerable to prolonged inundation and submergence. Uncertainty regarding their  
20 vulnerability to sea level rise motivated the establishment of a monitoring network in the  
21 Delaware Estuary and Barnegat Bay. Using data collected through these efforts, we determined  
22 whether rates of tidal marsh sediment accumulation and elevation change exceeded local sea  
23 level rise and how these dynamics varied along geographic and environmental gradients. Marker  
24 horizons, surface elevation tables, elevation surveys, water level data, and water column  
25 suspended sediment concentrations were used to evaluate sea level rise vulnerability. Of 32 study  
26 sites, 75% had elevation change that did not keep pace with long-term rising sea levels (1969–  
27 2018) and 94% did not keep pace with recent sea level rise (2000–2018). Mean high water rose

28 most rapidly in the freshwater tidal portion of the Delaware Estuary with rates nearing 1 cm yr<sup>-1</sup>  
29 from 2000–2018. We noted that greater sediment accumulation rates occurred in marshes with  
30 large tidal ranges, low elevations, and high water column suspended sediment concentrations.  
31 We found correlations between rates of shallow subsidence, increasing salinity, and decreasing  
32 tidal range. Marsh elevation and water level surveys revealed significant variability in elevation  
33 capital and summer flooding patterns (12–67% inundation). However, rapid increases in mean  
34 high water over the past 19 years suggests that all marsh platforms currently sit at or below mean  
35 high water. Overall, these data suggest that tidal marshes in the Delaware Estuary and Barnegat  
36 Bay are vulnerable to submergence by current rates of sea-level rise. While we observed  
37 variability in marsh elevation capital, the absence of strong correlations between elevation trends  
38 and environmental parameters makes it difficult to identify clear patterns of sea level rise  
39 vulnerability among wetlands.

## 40 **Introduction**

41 Tidal marshes can moderate some of the impacts of climate change including storm surge  
42 and wave attenuation, nutrient uptake and removal through denitrification, and mitigation of  
43 greenhouse gas emissions through carbon sequestration [1–3]. An analysis of damage caused by  
44 Hurricane Sandy in the U. S. Mid-Atlantic suggested that intact tidal marshes reduced flood  
45 damages by more than US \$625 million and lower annual flood risks around Barnegat Bay, NJ  
46 by up to 70% [4]. Ensuring the existence of tidal marshes in coastal areas bordering high-value  
47 infrastructure over the coming decades is an important part of protecting coastal communities  
48 from increased flood risk due to sea level rise (SLR) and extreme weather events like hurricanes  
49 [4–6].

50 Despite being assets for coastal community protection, tidal marshes are vulnerable to the  
51 impacts of SLR, especially when additional anthropogenic stressors reduce their elevation or  
52 accretionary capacity, such as declining sediment inputs and altered hydrology [7–10].  
53 Accumulation of plant material in the soil and sediment accumulation interact to build elevation  
54 through dynamic feedbacks with sea level [11–16]. Declines in sediment availability caused by  
55 channel dredging, upstream damming, and changes in agricultural practices, coupled with  
56 hydrological changes, such as mosquito ditching, attenuate tidal marsh responses to sea level  
57 changes by reducing sedimentation rates and increasing inundation [9, 17,18]. Further, as rates of  
58 SLR increase, it is not clear whether marshes that may already be vulnerable to inundation and  
59 low sediment supply will be able to increase elevation at rates that would prevent submergence.

60 SLR in the U. S. Mid-Atlantic is increasing faster than the global average due to steric  
61 sea level changes and geologic subsidence [19–23]. Long-term observations derived from local  
62 National Oceanic and Atmospheric Administration (NOAA) tidal gauges show that SLR in  
63 Delaware Estuary (ranging from  $2.98 \pm 0.19$  to  $4.63 \pm 0.50$  mm yr<sup>-1</sup>) and Barnegat Bay ( $4.09 \pm$   
64  $0.15$  mm yr<sup>-1</sup>) are nearly twice that of the early 20th century global average ( $1.7$  mm yr<sup>-1</sup>)[23].  
65 Projections of local SLR in Delaware suggest that rates will likely exceed 10 mm yr<sup>-1</sup> by 2100 for  
66 intermediate or high emission scenarios [24]. This projected rate approaches a critical threshold  
67 for tidal marsh elevation feedbacks, and suggests marsh drowning will occur [16]. Additionally,  
68 subsidence driven by local groundwater withdrawal [25] or historical land manipulations [26],  
69 such as diking, accelerates SLR locally and further expedites marsh drowning. In fact, tidal  
70 marsh loss due to submergence across the U. S. Northeast and Mid-Atlantic is already  
71 widespread [27–29].

72 Extensive disturbances in Barnegat Bay and below average elevations relative to tides in  
73 the Delaware Bay suggests that tidal marshes in both estuaries have a high degree of  
74 vulnerability to accelerating rates of SLR [18, 30–36]. Tidal marsh losses and increased interior  
75 flooding have been documented in both estuaries [7, 26–27, 30–36], but no analyses of elevation  
76 dynamics across these areas have been completed to date. Further, elevation change data from  
77 other locations in the Mid-Atlantic and Northeast have shown that SLR frequently exceeds  
78 marsh accumulation [37–42].

79 The importance of maintaining Mid-Atlantic tidal marshes for community protection,  
80 combined with ongoing evidence of marsh drowning, motivated the establishment of a  
81 monitoring network. Two National Estuary Programs in collaboration with the Academy of  
82 Natural Sciences of Drexel University established this network to determine how tidal marshes  
83 in the Delaware Estuary and Barnegat Bay are responding to accelerated SLR  
84 ([www.macwa.org](http://www.macwa.org)). A variety of data were collected as part of these monitoring efforts, but this  
85 particular study focuses on surface elevation change and surface accretion rates. Our objectives  
86 were to: (1) compare rates of marsh sediment accumulation and vertical elevation change to  
87 long-term and contemporary rates of SLR, as well as contemporary rates of rise in mean high  
88 water for the Delaware Estuary and Barnegat Bay; (2) to determine how elevation capital,  
89 salinity, tidal range, and water column suspended sediments influence elevation dynamics among  
90 geographically distinct tidal marshes.

## 91 **Materials and methods**

### 92 **Study Sites**

93 The Delaware Estuary, located in New Jersey, Delaware, and Pennsylvania, contains over  
94 66,000 ha of tidal marsh [35]. It has a length of approximately 215 km from the fall line at

95 Trenton, New Jersey to its confluence with the Atlantic Ocean. Upstream of Wilmington,  
96 Delaware, the estuary is freshwater (<0.3‰) riverine and has a tidal range between 1.6 and 2.3  
97 m. Downstream of Wilmington, salinities gradually transition to polyhaline (20–25‰) with tidal  
98 ranges from 1.2 to 1.7 m. Freshwater, brackish, and saline tidal marshes exist along this estuarine  
99 gradient. *Zizania aquatica*, *Peltandra virginica*, *Polygonum punctatum*, and *Nuphar advena* are  
100 among many herbaceous perennial and annual species that dominate tidal freshwater marshes in  
101 the Delaware River. Halophytic grasses, such as *Spartina alterniflora* (syn. *Sporobolus*  
102 *alterniflorus*), *Spartina patens* (syn. *Sporobolus pumilus*) and *Distichlis spicata*, dominate the  
103 brackish and saline marshes of the Delaware Bay. Because of heavy development in the Trenton-  
104 Philadelphia-Wilmington industrial corridor, only 16.7% of tidal freshwater wetlands remain in  
105 Pennsylvania from the pre-colonization extent (500 of ~3,000 ha) [35, 43] and at least six fresh  
106 intertidal plant species are extirpated from the tidal Delaware River [44]. Satellite imagery  
107 analyses suggest that marsh loss in the Delaware Estuary was ~80 ha y<sup>-1</sup> from 1996–2010 [35].  
108 Although wetland loss to development has declined, major threats remain. Marsh loss in the  
109 Delaware Estuary are occurring due to open water conversion linked to historical manipulations  
110 (e.g. diking, ditching), pervasive shoreline erosion, and anthropogenic limitations to sediment  
111 supplies (e.g. dredge spoil disposal, changes in agricultural practices, damming) [9, 26, 35, 44].

112 Barnegat Bay is a 520-km<sup>2</sup> shallow lagoon bordered to the east by a 65 km long barrier  
113 island separating the bay from the Atlantic Ocean. The 9,200 ha of salt marsh [36] fringing the  
114 Barnegat Bay are polyhaline (>18‰) and dominated by *S. alterniflora*, *S. patens*, and *D. spicata*.  
115 Tidal ranges are approximately <0.2–0.7 m depending on bathymetry and distance from the  
116 Bay's two inlets [45]. While northern Barnegat Bay is largely urbanized with extensive shoreline  
117 hardening (e.g. bulkheads), the southern region is less developed and contains more protected

118 lands (i.e., the Edwin B. Forsythe National Wildlife Refuge holds ~14,800 ha) [46]. Estimated  
119 rates of salt marsh loss in the Barnegat Bay were ~6 ha y<sup>-1</sup> from 1996–2010 [36]. Tidal marshes  
120 manipulation for mosquito population control have been extensive, with many marshes grid  
121 ditched and over 7,000 mosquito management ponds excavated [47]. Open marsh water  
122 management (OMWM), a mosquito management tactic, increases pond habitat to lure  
123 insectivorous fish to the high marsh, but the process also causes vegetation losses and affects  
124 elevation, as excavated peat is side-casted onto the marsh [18, 47].

## 125 **Monitoring protocols**

126 We established eleven monitoring sites in tidal marshes of the Delaware Estuary and  
127 Barnegat Bay, which varied in tidal range, salinity, and dominant vegetation type (Fig 1; Table  
128 1). For each site, three deep rod surface elevation tables (SET) were installed [48–49] between  
129 2010 and 2014 to measure marsh elevation change. Three feldspar marker horizon (MH) plots  
130 encircle each SET to measure short-term vertical sediment accumulation, or accretion [50].  
131 Combined, the SET-MH technique distinguishes elevation change by surface and subsurface  
132 processes, and can provide estimates of resilience to SLR [42, 49, 51]. Here, we calculated  
133 shallow subsidence by subtracting elevation change from accretion rates, so that negative values  
134 represent declining subsurface elevations [51]. We read SET-MHs twice a year over the course  
135 of 5–7 years, depending on installation dates.

136 **Fig 1. Monitoring sites in the tidal marshes of the Delaware Estuary and Barnegat Bay.**

137 **Table 1. Site descriptions for the Delaware River, Delaware Bay, and the Barnegat Bay.**

| Region         | Site             | Install Year | Location       | Latitude, Longitude     | Tidal Range (m) | Salinity (‰) | Dominant Vegetation                                  |
|----------------|------------------|--------------|----------------|-------------------------|-----------------|--------------|------------------------------------------------------|
| Delaware River | Crosswicks Creek | 2011         | Bordentown, NJ | 40° 9.76'N, 74° 42.51'W | 2.4             | 0.10         | <i>Z. aquatica</i> , <i>P. virginica</i> , <i>P.</i> |

|              |                    |      |                    |                          |     |      |                                                                                              |
|--------------|--------------------|------|--------------------|--------------------------|-----|------|----------------------------------------------------------------------------------------------|
|              |                    |      |                    |                          |     |      | <i>punctatum</i> , and <i>N. advena</i>                                                      |
|              | Tinicum            | 2010 | Philadelphia, PA   | 39° 53.05'N, 75° 16.49'W | 1.7 | 0.18 | <i>Z. aquatica</i> , <i>P. virginica</i> , <i>P. punctatum</i> , and <i>N. advena</i>        |
|              | Christina River    | 2010 | Wilmington, DE     | 39° 43.29'N, 75° 34.07'W | 1.7 | 0.40 | <i>Typha angustifolia</i> , <i>P. virginica</i> , <i>P. punctatum</i> , and <i>N. advena</i> |
| Delaware Bay | Dividing Creek     | 2012 | Dividing Creek, NJ | 39° 14.14'N, 75° 6.76'W  | 1.7 | 17   | <i>S. alterniflora</i> , <i>S. patens</i> , and <i>D. spicata</i>                            |
|              | Maurice River      | 2010 | Bivalve, NJ        | 39° 15.95'N, 74° 59.72'W | 1.7 | 11   | <i>S. alterniflora</i> , <i>S. patens</i> , and <i>D. spicata</i>                            |
|              | Dennis Creek       | 2011 | South Dennis, NJ   | 39° 10.58'N, 74° 51.74'W | 1.6 | 16   | <i>S. alterniflora</i> , <i>S. patens</i> , and <i>D. spicata</i>                            |
|              | Broadkill River    | 2014 | Lewes, DE          | 39° 47.13'N, 75° 10.75'W | 1.1 | 27   | <i>S. alterniflora</i> , <i>S. patens</i> , and <i>D. spicata</i>                            |
| Barnegat Bay | Island Beach       | 2011 | Seaside Park, NJ   | 39° 47.96'N, 74° 6.10'W  | 0.2 | 27   | <i>S. alterniflora</i>                                                                       |
|              | Dinner Point Creek | 2010 | West Creek, NJ     | 39° 37.43'N, 74° 16.20'W | 0.6 | 26   | <i>S. alterniflora</i>                                                                       |
|              | Horse Point        | 2012 | West Creek, NJ     | 39° 37.59'N, 74° 15.43'W | 0.6 | 26   | <i>S. alterniflora</i>                                                                       |
|              | Reedy Creek        | 2010 | Brick, NJ          | 40° 1.74'N, 74° 5.07'W   | 0.2 | 20   | <i>S. alterniflora</i> , <i>S. patens</i> , and <i>D. spicata</i>                            |

138

139 We conducted topographic surveys of tidal marsh elevations in each location from 2014  
 140 to 2018 using real-time kinematic GPS receivers (a Leica Viva GS14 GNSS Receiver and Viva  
 141 CS15 field controller, or a Trimble R10 GNSS receiver and TSC2 data controller). Data  
 142 collection followed National Geodetic Survey guidelines for the RT3 accuracy class (0.04–0.06

143 m horizontal; 0.04–0.08 m vertical precision): baselines <20 km, collection at 1 s intervals for  
144 15s, with a steady fixed height rover pole without use of a bipod [52].

145 We measured a suite of physicochemical parameters along five water quality stations 2–3  
146 times per year, in spring, fall, and/or summer. For each station, salinity was measured with a YSI  
147 (Professional Pro+, Xylem, Yellow Springs, OH) and samples were collected for further  
148 laboratory analyses, including total suspended sediment and dissolved nutrient concentrations  
149 (not reported). Additionally, we used existing available data and short-term water level logger  
150 deployments to determine local tidal datums for each site (Supporting Information).

## 151 **Calculations and data analysis**

152 Elevation capital, often expressed as marsh elevation relative to a tidal datum such as  
153 mean high water (MHW), is a useful proxy for tidal marsh vulnerability to SLR [14]. Tidal  
154 marshes with elevations near the upper limit of intertidal plant growth possess greater elevation  
155 capital and are more resilient to rising sea levels. Tidal datums relative to the National Tidal  
156 Datum Epoch (NTDE; 1983–2001) were computed for eight sites using the modified-range-ratio  
157 method on short-term water level measures derived from in-situ loggers (Supporting  
158 Information) [53]. This method is generally associated with accuracy of 2–3 cm for a 5-month  
159 period [54]. NOAA tide stations of Atlantic City, NJ, Lewes, DE, Cape May, NJ, or  
160 Philadelphia, PA served as controls. For Crosswicks Creek and the Christina River, tide ranges  
161 matched nearby NOAA tide stations (Newbold, PA and Delaware City, DE). Because these  
162 stations lacked datum conversions to the North American Vertical Datum 1988 (NAVD88), we  
163 obtained reference water levels by surveying water levels with real time kinematic surveys to  
164 permit conversion. We calculated average flooding times (%) for the median marsh elevations  
165 using 2016 or 2018 water level data. Elevation capital, expressed relative to MHW, was the



166 difference between median survey elevation (m NAVD88) and the elevation of local MHW (m  
167 NAVD88) relative to the National Tidal Datum Epoch (1983–2001).

168 To estimate rates of tidal marsh elevation change and sediment accumulation across the  
169 Delaware Estuary and Barnegat Bay, we constructed regressions of elevation and accretion  
170 against time [48, 51, 55–56]. We compared rates of accretion and vertical elevation change with  
171 local sea level rise (LSLR) trends derived from the nearest NOAA tide station [57]. We also  
172 compared trends in rates of elevation gain and sediment accretion with long-term (LT) (1969–  
173 2018) and short-term (ST) (2000–2018) trends in SLR and, as well as ST (2000–2018) rates of  
174 increase in mean high water level (ST MHWR). To be conservative, we concluded that a site was  
175 gaining elevation or accreting sediment at rates significantly greater than SLR if its rate of rise  
176 ( $\pm$ SE) exceeded LSR. Associations were identified between key processes that determine marsh  
177 survival (elevation capital, elevation change, accretion, and shallow subsidence) with gradients  
178 in environmental conditions (salinity, tidal range, water column dissolved organic carbon, and  
179 suspended sediment concentration) using linear regression.

180 Between 2011 and 2013, pond excavation associated with OMWM affected all of the  
181 SET-MHs at Dinner Point Creek in Barnegat Bay. We began monitoring in 2010–2012, prior to  
182 pond construction. In 2012, these activities casted  $\sim$ 0.20 m of sediment directly onto SET 1  
183 (Supporting Information). We then installed SET-MHs at Horse Point, an unaffected area  
184 adjacent to Dinner Point Creek. We excluded Dinner Point Creek SET 1 data from some  
185 analyses, where noted, because they were not representative of natural or ambient processes.

## 186 **Results**

187 Marsh elevation capital relative to MHW was variable among focal tidal marshes (Fig 2).  
188 In the Delaware Estuary, marshes along the Broadkill River, the Christina River, and Dennis

189 Creek possessed notable elevation capital, whereas Tinicum marshes sat low in the tidal frame.  
 190 In Barnegat Bay, Reedy Creek and Island Beach had lower elevation capital compared to Dinner  
 191 Point Creek and Horse Point. We found significant differences between long-term (i.e. NTDE)  
 192 and current high tide flooding levels (Tables 2 and 3), suggesting most marshes, with the  
 193 exception of Dinner Point Creek and Horse Point, sit well below the current MHW. Elevation of  
 194 the marsh relative to MHW influenced accretion ( $R^2=0.30, p<0.001$ ) and elevation change  
 195 ( $R^2=0.13, p<0.05$ ), such that sediment accretion and elevation change rates were greater for  
 196 marshes sitting low in the tidal frame (Fig 3). However, elevation did not influence rates of  
 197 shallow subsidence.

198 **Fig 2. Frequency distribution of marsh elevations in Barnegat Bay and the Delaware**  
 199 **Estuary relative to local MHW (NTDE) in meters.**

200 Vertical dashed line is 0.0 m MHW.

201

202 **Table 2. Median tidal marsh elevations relative to NAVD88, local MHW relative to the**  
 203 **NTDE, and summer-fall mean high tide levels.** Values were derived from 2016 water level  
 204 data, with the exception of the Broadkill River, where data are from 2018.

| Site                         | Median Elevations (m) |          |          | % Time Inundated |
|------------------------------|-----------------------|----------|----------|------------------|
|                              | NAVD88                | MHW NTDE | MHW 2016 |                  |
| Crosswicks Creek             | 1.10                  | -0.18    | -0.29    | 20%              |
| Tinicum                      | 0.44                  | -0.37    | -0.53    | 39%              |
| Christina River              | 0.62                  | 0.07     | -0.34    | 30%              |
| Dividing Creek               | 0.68                  | -0.04    | -0.29    | 27%              |
| Maurice River                | 0.67                  | -0.05    | -0.30    | 25%              |
| Dennis Creek                 | 0.61                  | -0.03    | -0.21    | 24%              |
| Broadkill River <sup>1</sup> | 0.39                  | 0.02     | -0.22    | 27% <sup>1</sup> |
| Reedy Creek                  | 0.13                  | 0.05     | -0.21    | 67%              |
| Island Beach                 | 0.19                  | 0.13     | -0.09    | 42%              |
| Horse Point                  | 0.40                  | 0.18     | -0.01    | 12%              |
| Dinner Point Creek           | 0.44                  | 0.25     | 0.00     | 12%              |

205

206 **Table 3. Long (1969–2018) and short-term (2000–2018) water level trends at NOAA**  
 207 **harmonic tidal datum stations from linear regression of monthly mean tidal data.**

| Tide gage | Associated monitoring site(s) | Mean sea level rise (mm yr <sup>-1</sup> ) |                 | Mean high water rise (mm yr <sup>-1</sup> ) |
|-----------|-------------------------------|--------------------------------------------|-----------------|---------------------------------------------|
|           |                               | LT<br>1969–2018                            | ST<br>2000–2018 | ST<br>2000–2018                             |
|           |                               |                                            |                 |                                             |

|                   |                                                            |      |      |      |
|-------------------|------------------------------------------------------------|------|------|------|
| Philadelphia, PA  | Crosswicks Creek, Tinicum                                  | 4.03 | 6.39 | 9.53 |
| Reedy Point, DE   | Christina River                                            | 4.16 | 5.60 | 7.11 |
| Lewes, DE         | Broadkill River                                            | 3.96 | 6.72 | 7.77 |
| Cape May, NJ      | Dividing Creek, Maurice River, Dennis Creek                | 4.86 | 6.81 | 8.53 |
| Atlantic City, NJ | Reedy Creek, Island Beach, Horse Point, Dinner Point Creek | 4.69 | 5.75 | 7.71 |

208

209 **Figure 3. Relationship between elevation capital relative to 2016 MHW and (A) elevation**  
210 **change, (B) accretion, and (C) shallow subsidence.**

211 Solid triangles are freshwater tidal marshes in the Delaware River, solid squares are salt marshes  
212 in the Delaware Bay, and hollow circles are salt marshes in the Barnegat Bay. There were no  
213 significant differences among estuaries.

214

215 Rates of LSLR and MHW were varied depending on the time period under consideration,  
216 with lower rates associated with longer time windows, and higher rates recorded over the past 19  
217 years (Table 3). Notably, LSLR was 44% greater over the past 19 years than over the last 50  
218 years, and over the past 19 years, the rise in MHW was significantly greater (30%) than LSLR  
219 (Table 3). The most rapid rate of rise was found for tidal marshes in the freshwater tidal portion  
220 of the Delaware Estuary, where MHW has approached 1 cm yr<sup>-1</sup> (0.95 cm yr<sup>-1</sup>), values that  
221 exceed even the most extreme forecasts for 21<sup>st</sup> century SLR rates (Najjar et al. 2000).

222 Comparisons of accretion and elevation change rates with LT LSLR show variability  
223 within and across estuaries and sites. Of the 32 surface elevation tables, excluding Dinner Point  
224 Creek SET 1, 75% had elevation trends that did not exceed rates of LT LSLR (1969–2018)  
225 (Supporting Information). When compared to ST LSLR and MHW, only 6% and 4% of marsh  
226 areas had rates of elevation increase that kept pace, respectively. Accumulation deficits, or the

227 difference between LT LSLR and elevation change, varied from -4.12 to 10.8 mm yr<sup>-1</sup> in the  
228 Delaware Estuary and -6.65 to 1.08 mm yr<sup>-1</sup> in Barnegat Bay (Table 4) (Supporting Information).

229 **Table 4. Ranges of elevation change, accretion, and shallow subsidence summarized by**  
230 **tidal freshwater marshes in the Delaware River, salt marshes in the Delaware Bay, and salt**  
231 **marshes in Barnegat Bay.** Median values are in brackets. In Barnegat Bay, Dinner Point Creek  
232 SET 1 was excluded from this table, due to dispersal of sediment from mosquito management  
233 practices causing anomalously high annual mean accretion and elevation change rates (>25 mm  
234 yr<sup>-1</sup>). Site-specific information is in Supporting Information.

| Marsh type                 | Rates (mm yr <sup>-1</sup> ) |                    |                      |
|----------------------------|------------------------------|--------------------|----------------------|
|                            | Elevation Change             | Accretion          | Shallow Subsidence   |
| Delaware River, freshwater | 2.73 to 14.8 [4.5]           | 5.19 to 17 [9.5]   | -9.41 to 4.54 [-3.8] |
| Delaware Bay, saltwater    | 0.74 to 6.89 [4.9]           | 3.19 to 10.1 [5.5] | -6.54 to 2.07 [-1.4] |
| Barnegat Bay, saltwater    | -1.96 to 5.77 [4.1]          | 1.91 to 6.72 [5.1] | -5.76 to 3.61 [-1.4] |

235  
236 Processes of elevation change, accretion, and shallow subsidence varied between the two  
237 estuaries, as well as along the salinity gradient in the Delaware Estuary (Figs 4 and 5; Table 4).  
238 Intra-site variation of elevation change was large at some sites, with the largest range at Tinicum  
239 (8.82 mm yr<sup>-1</sup>). Twenty-four of the 32 (75%) SET-MHs experienced shallow subsidence  
240 (Supporting Information; excluding Dinner Point Creek SET 1). Seven (21%) SET-MHs  
241 experienced subsurface expansion and only one site (3%) had elevation changes that were  
242 loosely equivalent to accretion (Maurice SET 2). Shallow subsurface processes had a substantial  
243 role in elevation dynamics, whether it was due to subsurface expansion (presumably linked to  
244 belowground production) or consolidation.

245 **Fig 4. Accretion and surface elevation change for (A) the tidal freshwater marshes in the**  
246 **Delaware River and (B) salt marshes in the Delaware Bay.**  
247 Horizontal dashed lines are LT SLR (1969–2018), ST SLR (2000–2018), or MHW derived  
248 from the nearest NOAA tide gages (superscripts denote tidal station used for each site, north to  
249 south: (a) Philadelphia, (b) Reedy Point, (c) Cape May, and (d) Lewes. Error bars are standard  
250 error.

251  
252 **Fig 5. Accretion (MHs) and surface elevation change (SETs) for Barnegat Bay.**  
253 Horizontal dashed lines are LT SLR (1969–2018), ST SLR (2000–2018), or MHW derived  
254 from NOAA's Atlantic City tide gage. Dispersal of the sediment across Dinner Point Creek SET

255 1 caused anomalously high annual mean accretion and elevation change rates ( $>25 \text{ mm yr}^{-1}$ ) and  
256 so, those data were excluded. Error bars are standard error.

257  
258 Associations among environmental parameters (salinity, tidal range, surface elevations,  
259 and water column suspended sediments) and accretion or elevation change rates were estuary-  
260 dependent (Figs 6–8). In the Delaware Estuary, maximum accretion rates occurred in tidal  
261 freshwater marshes, where suspended sediment concentrations were low and tidal ranges were  
262 large. While accretion rates were positively associated with tidal range ( $R^2 = 0.44, p < 0.05$ ) and  
263 water column suspended sediments ( $R^2 = 0.33, p < 0.05$ ) in Delaware Estuary salt marshes, this  
264 association was not significant for freshwater marshes or salt marshes in Barnegat Bay. In salt  
265 marshes of the Delaware Estuary, subsurface process rates were more negative (subsidence)  
266 where salinities were lower ( $R^2 = 0.42, p < 0.05$ ) and tidal ranges greater ( $R^2 = 0.42, p < 0.05$ ).

267 **Fig 6. Relationship between elevation change and (A) salinity, (B) tidal range, and (C) total**  
268 **suspended solids (TSS).**

269 Solid triangles are freshwater tidal marshes in the Delaware River (DF) and solid squares are salt  
270 marshes in the Delaware Bay (DS). Hollow circles are salt marshes in the Barnegat Bay (BB).  
271 Dispersal of the sediment across Dinner Point Creek SET 1 as part of construction of mosquito  
272 control ponds caused anomalously high ( $>25 \text{ mm yr}^{-1}$ ) values for accretion (hollow stars) and so,  
273 those data were excluded from analyses.

274  
275 **Fig 7. Relationship between sediment accretion and (A) salinity, (B) tidal range, and (C)**  
276 **total suspended solids (TSS).**

277 Solid triangles are freshwater tidal marshes in the Delaware River (DF) and solid squares are salt  
278 marshes in the Delaware Bay (DS). Hollow circles are salt marshes in the Barnegat Bay (BB).  
279 Data from Dinner Point Creek SET 1 (hollow stars) were excluded from these analyses.

280  
281 **Fig 8. Relationship between shallow subsidence and (A) salinity, (B) tidal range, and (C)**  
282 **total suspended solids (TSS).**

283 Solid triangles are freshwater tidal marshes in the Delaware River (DF), solid squares are salt  
284 marshes in the Delaware Bay (DS), and hollow circles are salt marshes in the Barnegat Bay  
285 (BB). Solid triangles are freshwater tidal marshes in the Delaware River, solid squares are salt  
286 marshes in the Delaware Bay, and hollow circles are salt marshes in the Barnegat Bay.  $R_D^2$  is the  
287 Delaware Estuary and  $R_B^2$  is for Barnegat Bay.

288  
289 Sediment placement by OMWM at Dinner Point Creek SET 1 increased absolute

290 elevations by more than 18 cm, but elevations have declined by 10 cm since 2013 (Supporting

291 Information). Rates of elevation change were  $4.9 \text{ mm yr}^{-1}$  ( $R^2= 0.93$ ,  $p < 0.05$ ) before placement,  
292 then declined to  $-13.5 \text{ mm yr}^{-1}$  ( $R^2=0.83$ ,  $p < 0.001$ ) after placement. These rates are not  
293 representative of natural accretion or elevation change so the Dinner Point Creek SET 1 data  
294 point was removed from elevation change and accretion analyses. Rates of shallow subsidence at  
295 this location, however, were not anomalous so we retained those values.

## 296 **Discussion**

297 Few of the studied tidal marshes had rates of elevation change equal to or greater than LT  
298 or ST LSLR, suggesting that regional marsh loss may be associated with deficits in vertical  
299 accretion. Although accretion rates were comparable to LT LSLR, shallow subsidence offset the  
300 effects of surface accretion, and thus few sites had elevation change rates that “kept pace” with  
301 LT LSLR. From 1996–2010, tidal marsh area in Barnegat Bay and the Delaware Estuary  
302 declined by  $199 \text{ ha yr}^{-1}$  [35] and  $194 \text{ ha yr}^{-1}$  [36], respectively. Tidal marsh loss in Maryland  
303 [40], New York City [58], and Rhode Island [42] have been similarly linked to elevation changes  
304 less than LSLR. Losses, coupled with ongoing interior marsh loss and deterioration [27–28, 34,  
305 37], indicate that many marshes in this region are unable to maintain elevations relative to  
306 accelerating sea level rise.

307 Rates of elevation change, accretion, and shallow subsidence varied across our study  
308 sites, which included tidal marshes in a coastal lagoon as well as in tidal freshwater and saline  
309 portions of a large coastal plain estuary. In the Delaware Estuary, rates of accretion and  
310 subsurface processes varied between salt (median values of  $5.5 \text{ mm yr}^{-1}$  for accretion and  $-1.4$   
311  $\text{mm yr}^{-1}$  for shallow subsidence) and freshwater marshes (median values of  $9.5 \text{ mm yr}^{-1}$  for  
312 accretion and  $-3.8 \text{ mm yr}^{-1}$  for shallow subsidence). Differences in dominant vegetation structure  
313 and sediment sourcing contribute to higher rates of accretion in tidal freshwater marshes

314 compared to salt marshes, as others have previously discussed [59–61]. In Barnegat Bay and  
315 Delaware Estuary salt marshes, magnitudes of elevation change (median values of 4.9 and 4.1  
316 mm yr<sup>-1</sup>, respectively) and accretion (median values of 5.5 and 5.1 mm yr<sup>-1</sup>, respectively) were  
317 comparable, despite higher salinities, lower suspended sediment concentrations, and smaller tidal  
318 ranges in Barnegat Bay. Previous findings suggest that in addition to sedimentation, organic  
319 production plays an important role in accretion for Barnegat Bay salt marshes [31].

320 As rates of elevation change and accretion rates are higher at lower elevations, it can be  
321 problematic to discern drowning or vulnerability to open water conversion without added context  
322 of elevation capital [58, 62]. For instance, accretion and elevation change rates at Tinicum  
323 mostly exceeded ST SLR, yet, these marshes sit low in the tidal frame (-0.47 m MHW), and they  
324 flooded 39% of the time during the 2016 growing season. As such, rising flood frequencies may  
325 drown vegetation at Tinicum before marshes that have greater elevation capital, but lower  
326 accretion rates. Similarly, in Barnegat Bay, Reedy Creek had lower elevation capital (0.05 m  
327 MHW) and flooding was frequent (67%), despite elevation change and accretion rates that were  
328 approximately equal with LT SLR. For tidal marshes with more elevation capital, like Horse  
329 Point (0.18 m MHW), lower elevation change or accretion rates likely reflect less sediment  
330 delivery due to less frequent tidal flooding. Thus, high accumulation or high elevation gains –  
331 rather than a symptom of high SLR resilience – may instead reflect submergence due to positive  
332 feedbacks between flooding frequency, sediment deposition, and high water column suspended  
333 sediment concentrations liberated by degrading or fragmenting wetlands.

334 Elevation processes, specifically accretion, do not wholly capture tidal marsh  
335 vulnerability to drowning or loss as other sediment dynamics also contribute to tidal marshes  
336 stability. In two Maryland-based studies, Ganju et al. [63–64] found that net sediment export

337 likely drove deterioration and instability of tidal marshes at Blackwater River, despite abundant  
338 suspended sediment and seemingly adequate accretion rates relative to sea level rise. Thus,  
339 Ganju et al. surmised that the release of organic marsh sediments through the deterioration  
340 process might subsidize suspended sediment concentrations and sedimentation rates [64]. In a  
341 follow-up study, Ganju et al. monitored sediment dynamics at two sites in our monitoring  
342 network: deteriorated Reedy Creek, where marshes are fragmenting, and Dinner Point Creek,  
343 which was relatively stable with a larger proportion of vegetated marsh area [65]. Those results  
344 similarly found that deterioration at Reedy Creek correlated with larger net export of sediments  
345 compared to Dinner Point Creek. From our results, rates of accretion and elevation change at  
346 Reedy Creek ranged from 4.52–6.72 mm yr<sup>-1</sup> and 2.24–5.77 mm yr<sup>-1</sup>, respectively. Accretion and  
347 elevation change rates at Horse Point, located adjacent to Dinner Point Creek yet undisturbed  
348 from pond excavation, ranged from 5.39–5.87 mm yr<sup>-1</sup> and 3.92–4.40 mm yr<sup>-1</sup>, respectively. Our  
349 findings ultimately support previous assertions that high rates of sediment accretion or elevation  
350 do not protect against marsh loss if they are a symptom of marsh degradation and fragmentation.

351         Although it is convention to compare tidal marsh elevation changes to LT LSLR trends to  
352 determine if accumulation debts are accruing [51], we find that ST LSLR or MHW trends more  
353 adequately represented changing inundation regimes in tidal marshes. Analysis of water levels  
354 suggest that SLR in our region was 44% greater during the 2000–2018 period than it was over  
355 the last 50 years (1969–2018), and in addition, rates of MHW rise over the past 19 years were  
356 nearly double rates of LT SLR (87% greater) (Table 3). In this study, ST LSLR and MHW did  
357 not increase proportionately with LT LSLR across sites, so local conditions may contribute to  
358 how inundation patterns change in response to accelerating LSLR. A previous study on tidal  
359 datum changes in the U.S. similarly found that mean high water rose faster than mean sea level



360 at tidal gages in Atlantic City, NJ, Cape May, NJ, and Lewes, DE [66]. If local MHW rises faster  
361 than LSLR, comparing LT LSLR to elevation change rates could lead to underestimations of  
362 tidal marsh SLR vulnerability. Although differences between rates of elevation change and ST  
363 SLR or MHW presented in this study were concerning, these differences could also represent  
364 lags or shifts in tidal marsh elevation dynamics [16] that were not captured in this 8-year dataset,  
365 which only further monitoring might elucidate.

366 Broadly, our results serve as a baseline to evaluate how patterns between elevation  
367 change and inundation become detrimental to tidal wetlands as SLR accelerates. Elevation  
368 changes relative to LSLR dynamically associate with tidal marsh elevation capital, and so,  
369 accretion is likely to increase with rising water levels. Although increased flooding facilitates  
370 greater accretion, temporal lags may exist between increasing depth and duration of floods and  
371 cumulative sediment accumulation [16]. Tidal marsh plants are most productive within a specific  
372 range of elevations relative to local tidal datum [11], so delays in elevation building by  
373 sedimentation leads to reduced plant production as rapidly rising water levels surpass optimal  
374 growth elevations. Indeed, many recent studies have attributed marsh losses to plant intolerance  
375 to excessive flooding caused by rising water levels [29, 67–70]. Subsequent vegetated area losses  
376 cause further destabilization through net sediment export [65]. A portion of our sites had  
377 accretion rates congruent with LT SLR and nearly all were well below ST SLR, thus we posit  
378 that sedimentation paces dynamically with LT SLR but lags behind ST SLR so that biological  
379 limitations associated with plant flood tolerance drives marsh deterioration or drowning. In  
380 future studies, it may be more pragmatic to ask whether marshes are “catching up” with SLR,  
381 rather than intrinsically “keeping pace.”

## 382 **Conclusions**

383 Rates of elevation change in most (96%) tidal marshes across the Delaware Estuary and  
384 Barnegat Bay have not kept pace with recent (2000–2018) rising water levels. Accumulation  
385 deficits, relative to LT LSLR (1969–2018), varied from -4.12 to +10.8 mm yr<sup>-1</sup> in the Delaware  
386 Estuary and -6.59 to +1.08 mm yr<sup>-1</sup> in Barnegat Bay. Overall, rates of elevation change, sediment  
387 accumulation, and shallow subsidence varied between estuaries and across sites. Relationships  
388 among these rates and salinity, water column suspended sediments, and tidal range differed by  
389 geography. We found that more recent water level information was useful in determining  
390 inundation frequency more precisely. Due to the importance of sustained tidal marsh acreage to  
391 coastal communities across the U. S. Mid Atlantic, we hope these data provide much-needed  
392 context for future intervention efforts focused on preventing losses due to rising sea levels in our  
393 region.

## 394 **Acknowledgements**

395 We are immensely grateful for all support provided over the years by our numerous partners  
396 across Delaware, Pennsylvania, and New Jersey. We wish to thank Kathleen Drake, Dorina  
397 Frizzera, Irene Purdy, and Kathleen Walz for their support. We also thank Melanie Mills, Erin  
398 Reilly, and Jessie Buckner for their early contributions to this work.

## 399 **References**

- 400 1. Chmura GL, Anisfeld SC, Cahoon DR, Lynch JC. Global carbon sequestration in tidal,  
401 saline wetland soils. *Global Biogeochem Cycles* 2003;**17**:12. <https://doi.org/10.1029/2002gb001917>.
- 403 2. Loomis MJ, Craft CB. Carbon Sequestration and Nutrient (Nitrogen, Phosphorus)  
404 Accumulation in River-Dominated Tidal Marshes, Georgia, USA. *Soil Sci Soc Am J*  
405 2010;**74**:1028. <https://doi.org/10.2136/sssaj2009.0171>.
- 406 3. Carr EW, Shirazi Y, Parsons GR, Hoagland P, Sommerfield CK.. Modeling the  
407 Economic Value of Blue Carbon in Delaware Estuary Wetlands: Historic Estimates and

- 408 Future Projections. *J Environ Manage* 2018;**206**:40–50.  
409 <https://doi.org/10.1016/j.jenvman.2017.10.018>.
- 410 4. Narayan S, Beck MW, Wilson P, Thomas CJ, Guerrero A, Shepard CC, *et al.* The Value  
411 of Coastal Wetlands for Flood Damage Reduction in the Northeastern USA. *Sci Rep*  
412 2017;**7**:1–12. <https://doi.org/10.1038/s41598-017-09269-z>.
- 413 5. Arkema KK, Guannel G, Verutes G, Wood S a., Guerry A, Ruckelshaus M, *et al.* Coastal  
414 habitats shield people and property from sea-level rise and storms. *Nat Clim Chang*  
415 2013;**3**:913–8. <https://doi.org/10.1038/nclimate1944>.
- 416 6. Sutton-Grier AE, Wowk K, Bamford H. Future of our coasts: The potential for natural  
417 and hybrid infrastructure to enhance the resilience of our coastal communities, economies  
418 and ecosystems. *Environ Sci Policy* 2015;**51**:137–48.  
419 <https://doi.org/10.1016/j.envsci.2015.04.006>.
- 420 7. Lathrop RG, Cole MB, Showalter RD. Quantifying the habitat structure and spatial  
421 pattern of New Jersey (U.S.A.) salt marshes under different management regimes. *Wetl*  
422 *Ecol Manag* 2000;**8**:163-172.
- 423 8. Nikitina DL, Kemp AC, Horton BP, Vane CH, van de Plassche O, Engelhart SE. Storm  
424 erosion during the past 2000 years along the north shore of Delaware Bay, USA.  
425 *Geomorphology* 2014;**208**:160–72. <https://doi.org/10.1016/j.geomorph.2013.11.022>.
- 426 9. Weston NB. Declining Sediments and Rising Seas: An Unfortunate Convergence for  
427 Tidal Wetlands. *Estuaries and Coasts* 2014;**37**:1–23. [https://doi.org/10.1007/s12237-013-](https://doi.org/10.1007/s12237-013-9654-8)  
428 [9654-8](https://doi.org/10.1007/s12237-013-9654-8).
- 429 10. Lotze HK, Lenihan HS, Bourque BJ, Bradbury RH, Cooke RG, Kay MC, *et al.*  
430 Depletion, Degradation, and Recovery Potential of Estuaries and Coastal Seas. *Science*  
431 (80- ) 2006;**312**:1806–9.
- 432 11. Morris JT, Sundareshwar P V., Nietch CT, Kjerfve B, Cahoon DR. Responses of coastal  
433 wetlands to rising sea level. *Ecology* 2002;**83**:2869–77. [https://doi.org/10.1890/0012-](https://doi.org/10.1890/0012-9658(2002)083[2869:ROCWTR]2.0.CO;2)  
434 [9658\(2002\)083\[2869:ROCWTR\]2.0.CO;2](https://doi.org/10.1890/0012-9658(2002)083[2869:ROCWTR]2.0.CO;2).
- 435 12. Nyman JA, Walters RJ, Delaune RD, Patrick WH, Nyman JA, Walters RJ, *et al.* Marsh  
436 vertical accretion via vegetative growth. *Estuar Coast Shelf Sci* 2006;**69**:370–80.  
437 <https://doi.org/10.1016/j.ecss.2006.05.041>.
- 438 13. Mudd SM, Howell SM, Morris JT. Impact of dynamic feedbacks between sedimentation,  
439 sea-level rise, and biomass production on near-surface marsh stratigraphy and carbon  
440 accumulation. *Estuar Coast Shelf Sci* 2009;**82**:377–89.  
441 <https://doi.org/10.1016/j.ecss.2009.01.028>.
- 442 14. Cahoon DR, Guntenspergen GR. Climate Change, Sea-Level Rise, and Coastal Wetlands.  
443 *Natl Wetl Newsl* 2010;**32**.

- 444 15. D'Alpaos A, Mudd SM, Carniello L. Dynamic response of marshes to perturbations in  
445 suspended sediment concentrations and rates of relative sea level rise. *J Geophys Res*  
446 *Earth Surf* 2011;**116**:1–13. <https://doi.org/10.1029/2011JF002093>.
- 447 16. Fagherazzi S, Kirwan ML, Mudd SM, Guntenspergen GR, Temmerman S, Rybczyk JM,  
448 *et al.* Numerical models of salt marsh evolution: Ecological, geomorphic, and climatic  
449 factors. *Rev Geophys* 2012;**50**:1–28. <https://doi.org/10.1029/2011RG000359>.
- 450 17. Mudd SM. The life and death of salt marshes in response to anthropogenic disturbance of  
451 sediment supply. *Geol Soc Am* 2011;**39**:511–2. <https://doi.org/10.1130/focus052011.1>.
- 452 18. Eelsey-Quirk T, Adamowicz SC. Influence of Physical Manipulations on Short-Term Salt  
453 Marsh Morphodynamics: Examples from the North and Mid-Atlantic Coast, USA.  
454 *Estuaries and Coasts* 2015;**39**:423–39. <https://doi.org/10.1007/s12237-015-0013-9>.
- 455 19. Engelhart SE, Peltier WR, Horton BP. Holocene relative sea-level changes and glacial  
456 isostatic adjustment of the U. S. Atlantic coast 2011; **39**:751–4.  
457 <https://doi.org/10.1130/G31857.1>.
- 458 20. Engelhart SE, Horton BP. Holocene sea level database for the Atlantic coast of the  
459 United States. *Quat Sci Rev* 2012;**54**:12–25.  
460 <https://doi.org/10.1016/j.quascirev.2011.09.013>
- 461 21. Ezer T, Atkinson LP, Corlett WB, Blanco JL. Gulf Stream's induced sea level rise and  
462 variability along the U.S. Mid-Atlantic coast. *J Geophys Res Ocean* 2013;**118**:685–97.  
463 <https://doi.org/10.1002/jgrc.20091>.
- 464 22. Sallenger AH, Doran KS, Howd PA. Hotspot of accelerated sea-level rise on the Atlantic  
465 coast of North America. *Nat Clim Chang* 2012;**2**:884–8.  
466 <https://doi.org/10.1038/nclimate1597>.
- 467 23. Church JA, Clark PU, Cazenave A, Gregory JM, Jevrejeva S, Levermann A, *et al.* Sea  
468 level change. *Clim. Chang. 2013 Phys. Sci. Basis. Contrib. Work. Gr. I to Fifth Assess.*  
469 *Rep. Intergov. Panel Clim. Chang.* 2013. p. 1137–216. Available from:  
470 [https://www.ipcc.ch/site/assets/uploads/2018/02/WG1AR5\\_Chapter13\\_FINAL.pdf](https://www.ipcc.ch/site/assets/uploads/2018/02/WG1AR5_Chapter13_FINAL.pdf)
- 471 24. Callahan JA, Benjamin P. Horton, Nikitina DL, Sommerfield CK, McKenna TE,  
472 Swallow D. *Recommendation of Sea-Level Rise Planning Scenarios for Delaware:*  
473 *Technical Report*, prepared for Delaware Department of Natural Resources and  
474 Environmental Control (DNREC) Delaware Coastal Programs. 2017. Available from:  
475 [https://southbethany.delaware.gov/files/2018/11/Attachment-6-to-February-2018-Mayor-Report-](https://southbethany.delaware.gov/files/2018/11/Attachment-6-to-February-2018-Mayor-Report-Technical-Report-Regarding-SLR-Planning-Scenarios.pdf)  
476 [Technical-Report-Regarding-SLR-Planning-Scenarios.pdf](https://southbethany.delaware.gov/files/2018/11/Attachment-6-to-February-2018-Mayor-Report-Technical-Report-Regarding-SLR-Planning-Scenarios.pdf).
- 477 25. Sun H, Grandstaff D, Shagam R. Land subsidence due to groundwater withdrawal:  
478 Potential damage of subsidence and sea level rise in southern New Jersey, USA. *Environ*  
479 *Geol* 1999;**37**:290–6. <https://doi.org/10.1007/s002540050386>.

- 480 26. Smith JAM, Hafner SF, Niles LJ. The Impact of Past Management Practices on Tidal  
481 Marsh Resilience to Sea Level Rise in the Delaware Estuary. *Ocean Coast Manag*  
482 2017;**149**:33–41. <https://doi.org/10.1016/j.ocecoaman.2017.09.010>.
- 483 27. Kearney MS, Rogers AS, Townshend JRG, Rizzo E, Stutzer D, Stevenson JC, *et al.*  
484 Landsat imagery shows decline of coastal marshes in Chesapeake and Delaware Bays.  
485 *Eos, Trans Am Geophys Union* 2002;**83**:173. <https://doi.org/10.1029/2002EO000112>.
- 486 28. Hartig EK, Gornitz V, Kolker A, Mushacke F, Fallon D. Anthropogenic and Climate-  
487 Change Impacts on Salt Marshes of Jamaica Bay, New York City. *Wetlands* 2002;**22**:71–  
488 89. [https://doi.org/10.1672/0277-5212\(2002\)022\[0071:AACCIO\]2.0.CO;2](https://doi.org/10.1672/0277-5212(2002)022[0071:AACCIO]2.0.CO;2).
- 489 29. Watson EB, Raposa KB, Carey JC, Wigand C, Warren RS. Anthropocene Survival of  
490 Southern New England’s Salt Marshes. *Estuaries and Coasts* 2016.  
491 <https://doi.org/10.1007/s12237-016-0166-1>.
- 492 30. Elsey-Quirk T. Impact of Hurricane Sandy on salt marshes of New jersey. *Estuar Coast*  
493 *Shelf Sci* 2016;**183**:235–48. <https://doi.org/10.1016/j.ecss.2016.09.006>.
- 494 31. Elsey-Quirk T, Unger V. Geomorphic influences on the contribution of vegetation to soil  
495 C accumulation and accretion in *Spartina alterniflora* marshes. *Biogeosciences*  
496 2018;**15**:379–97. <https://doi.org/10.5194/bg-15-379-2018>.
- 497 32. Ferrigno F, Widjeskog L, Toth S. Pittman-Robertson Report Proj. W-53-R-1, Job I-G. In:  
498 Marsh Destruction, New Jersey Department of Environmental Protection. 1973.
- 499 33. Field RT, Philipp KR. Vegetation changes in the freshwater tidal marsh of the Delaware  
500 Estuary. *Wetl Ecol Manag* 2000;**8**: 79–88. <https://doi.org/10.1023/A:1008480116062>.
- 501 34. Kearney MS, Riter JCA. Inter-annual variability in Delaware Bay brackish marsh  
502 vegetation, USA. *Wetl Ecol Manag* 2011;**19**:373–88. [https://doi.org/10.1007/s11273-011-](https://doi.org/10.1007/s11273-011-9222-6)  
503 [9222-6](https://doi.org/10.1007/s11273-011-9222-6).
- 504 35. Haaf L, Kreeger D, Homsey A. Chapter 5.2 - Intertidal marsh In: Technical Report for  
505 the Delaware Estuary and Basin. Partnership for the Delaware Estuary. PDE Report No.  
506 17-07. 2017: 177–193. Available from: [http://www.delawareestuary.org/data-and-](http://www.delawareestuary.org/data-and-reports/state-of-the-estuary-report/)  
507 [reports/state-of-the-estuary-report/](http://www.delawareestuary.org/data-and-reports/state-of-the-estuary-report/).
- 508 36. Buckner J, Haaf L, Padeletti A, Kreeger D, Maxwell-Doyle M. Trends in Salt Marsh  
509 Acreage for Barnegat Bay. Barnegat Bay Partnership, Toms River, NJ. 2018:1-16.
- 510 37. Erwin RM, Cahoon DR, Prosser DJ, Sanders GM, Hensel P. Surface elevation dynamics  
511 in vegetated *Spartina* marshes versus unvegetated tidal ponds along the Mid-Atlantic  
512 coast, USA, with implications to waterbirds. *Estuaries and Coasts* 2006;**29**:96–106.  
513 <https://doi.org/10.1007/BF02784702>.
- 514 38. Delgado P, Hensel PF, Swarth CW, Ceroni M, Boumans R. Sustainability of a Tidal  
515 Freshwater Marsh Exposed to a Long-term Hydrologic Barrier and Sea Level Rise: A

- 516 Short-term and Decadal Analysis of Elevation Change Dynamics. *Estuaries and Coasts*  
517 2013;**36**:585–94. <https://doi.org/10.1007/s12237-013-9587-2>.
- 518 39. Cadol D, Engelhardt K, Elmore A, Sanders G. Elevation-dependent surface elevation  
519 gain in a tidal freshwater marsh and implications for marsh persistence. *Limnol Oceanogr*  
520 2014;**59**:1065–80. <https://doi.org/10.4319/lo.2014.59.3.1065>.
- 521 40. Beckett LH, Baldwin AH, Kearney MS. Tidal marshes across a Chesapeake Bay  
522 subestuary are not keeping up with sea-level rise. *PLoS One* 2016;**11**:1–12.  
523 <https://doi.org/10.1371/journal.pone.0159753>.
- 524 41. Carey JC, Raposa KB, Wigand C, Warren RS. Contrasting decadal-scale changes  
525 elevation and vegetation in two Long Island Sound salt marshes. *Estuaries and Coasts*  
526 2017;**40**:651–61. <https://doi.org/10.1007/s12237-015-0059-8>.
- 527 42. Raposa KB, Cole ML, Burdick DM, Ernst T, Adamowicz SC. Elevation change and the  
528 vulnerability of Rhode Island (USA) salt marshes to sea-level rise. *Reg Environ Chang*  
529 2017;**71**:398–97. <https://doi.org/10.1007/s10113-016-1020-5>.
- 530 43. Pennsylvania Natural Heritage Program. A Natural Heritage Inventory of Philadelphia  
531 County, Pennsylvania. 2008:1-248. Available from:  
532 [http://www.naturalheritage.state.pa.us/cnai\\_pdfs/philadelphia\\_county\\_nhi\\_2008\\_web.pdf](http://www.naturalheritage.state.pa.us/cnai_pdfs/philadelphia_county_nhi_2008_web.pdf)
- 533 44. Ferren WRJ, Schuyler AE. Intertidal Vascular Plants of River Systems near Philadelphia.  
534 *Proc Acad Nat Sci Philadelphia* 1980;**132**:86–120.
- 535 45. Defne Z, Ganju NK. Quantifying the Residence Time and Flushing Characteristics of a  
536 Shallow, Back-Barrier Estuary: Application of Hydrodynamic and Particle Tracking  
537 Models. *Estuaries and Coasts* 2014;**38**:1719–34. <https://doi.org/10.1007/s12237-014-9885-3>.  
538
- 539 46. Barnegat Bay Partnership. State of the Bay. 2016:1–80. Available from:  
540 [https://www.barnegatbaypartnership.org/wp-content/uploads/2017/08/BBP\\_State-of-the-Bay-book-2016\\_forWeb-1.pdf](https://www.barnegatbaypartnership.org/wp-content/uploads/2017/08/BBP_State-of-the-Bay-book-2016_forWeb-1.pdf).  
541
- 542 47. Powell, E. P. The Effect of Open Marsh Water Management Practices on the Carbon  
543 Balance of Tidal Marshes in Barnegat Bay, New Jersey. Master Thesis. Drexel  
544 University. 2018. Available from: <http://hdl.handle.net/1860/idea:7834>
- 545 48. Cahoon DR, Lynch JC, Perez BC, Segura B, Holland RD, Stelly C, *et al.* High-Precision  
546 Measurements of Wetland Sediment Elevation: II. The Rod Surface Elevation Table. *J*  
547 *Sediment Res* 2002;**72**:734–9. <https://doi.org/10.1306/020702720734>.
- 548 49. Lynch JC, Hansel P, Cahoon DR. The Surface Elevation Table and Marker Horizon  
549 Technique A Protocol for Monitoring Wetland Elevation Dynamics. Natural Resource  
550 Report NPS/NCBN/NRR—2015/1078. 2015. Available from:  
551 <https://irma.nps.gov/DataStore/Reference/Profile/2225005>.

- 552 50. Cahoon DR, Turner RE. Accretion and canal impacts in a rapidly subsiding wetland II.  
553 Feldspar marker horizon technique. *Estuaries* 1989;**12**:260-8.
- 554 51. Cahoon DR. Estimating Relative Sea-Level Rise and Submergence Potential at a Coastal  
555 Wetland. *Estuaries and Coasts* 2015;**38**:1077–84. [https://doi.org/10.1007/s12237-014-](https://doi.org/10.1007/s12237-014-9872-8)  
556 [9872-8](https://doi.org/10.1007/s12237-014-9872-8).
- 557 52. Henning, W. User Guidelines for Single Base Real Time GNSS Positioning. National  
558 Geodetic Survey: Silver Spring, MD, USA, 2011:1–138.
- 559 53. National Oceanic and Atmospheric Administration. Computational Techniques for Tidal  
560 Datums Handbook. 2003. Available from:  
561 [https://tidesandcurrents.noaa.gov/publications/Computational\\_Techniques\\_for\\_Tidal\\_Dat-](https://tidesandcurrents.noaa.gov/publications/Computational_Techniques_for_Tidal_Datums_handbook.pdf)  
562 [ums\\_handbook.pdf](https://tidesandcurrents.noaa.gov/publications/Computational_Techniques_for_Tidal_Datums_handbook.pdf)
- 563 54. Swanson RL. Variability of tidal datums and accuracy in determining datums from short  
564 series of observations. National Oceanic and Atmospheric Administration Tech. Rep.  
565 NOS 64. 1974:1–41.
- 566 55. Wickham H. ggplot2: Elegant Graphics for Data Analysis. Springer-Verlag New York.  
567 2009.
- 568 56. R Core Team. R: A language and environment for statistical computing. R Foundation  
569 for Statistical Computing, Vienna, Austria. 2019. Available from: [http://www.R-](http://www.R-project.org/)  
570 [project.org/](http://www.R-project.org/)
- 571 57. National Oceanic and Atmospheric Administration Tides & Currents. Station IDs  
572 8545240, 8551910, 8536110, and 8557380. Available from  
573 <https://tidesandcurrents.noaa.gov/sltrends/>
- 574 58. Cahoon DR, Lynch JC, Roman CT, Schmit JP, Skidds DE. Evaluating the Relationship  
575 Among Wetland Vertical Development, Elevation Capital, Sea-Level Rise, and Tidal  
576 Marsh Sustainability. *Estuaries and Coasts* 2019;**42**:1–15.  
577 <https://doi.org/10.1007/s12237-018-0448-x>.
- 578 59. Ensign SH, Hupp CR, Noe GB, Krauss KW, Stagg CL. Sediment Accretion in Tidal  
579 Freshwater Forests and Oligohaline Marshes of the Waccamaw and Savannah Rivers,  
580 USA. *Estuaries and Coasts* 2014;**37**:1107–19. [https://doi.org/10.1007/s12237-013-9744-](https://doi.org/10.1007/s12237-013-9744-7)  
581 [7](https://doi.org/10.1007/s12237-013-9744-7).
- 582 60. Ensign SH, Noe GB, Hupp CR, Skalak KJ. Head-of-tide bottleneck of particulate  
583 material transport from watershed to estuaries. *Geophys Res Lett* 2015;**42**:671–9.  
584 <https://doi.org/10.1002/2015GL066830>.Received.
- 585 61. Palinkas CM, Engelhardt KAM. Influence of Inundation and Suspended-Sediment  
586 Concentrations on Spatiotemporal Sedimentation Patterns in a Tidal Freshwater Marsh.  
587 *Wetlands* 2019;**39**:507–20. <https://doi.org/10.1007/s13157-018-1097-3>.

- 588 62. Cahoon DR, Reed DJ, Day JW. Estimating shallow subsidence in microtidal salt marshes  
589 of the southeastern United States: Kaye and Barghoorn revisited. *Mar Geol* 1995;**128**:1–  
590 9. [https://doi.org/10.1016/0025-3227\(95\)00087-F](https://doi.org/10.1016/0025-3227(95)00087-F).
- 591 63. Ganju NK, Nidzieko NJ, Kirwan ML. Inferring tidal wetland stability from channel  
592 sediment fluxes: Observations and a conceptual model. *J Geophys Res Earth Surf*  
593 2013;**118**:2045–58. <https://doi.org/10.1002/jgrf.20143>.
- 594 64. Ganju NK, Kirwan ML, Dickhudt PJ, Guntenspergen GR, Cahoon DR, Kroeger KD.  
595 Sediment transport-based metrics of wetland stability. *Geophys Res Lett* 2015;**42**:7992–  
596 8000. <https://doi.org/10.1002/2015GL065980>.
- 597 65. Ganju NK, Defne Z, Kirwan ML, Fagherazzi S, D’Alpaos A, Carniello L, *et al.* Spatially  
598 integrative metrics reveal hidden vulnerability of microtidal salt marshes. *Nat Commun*  
599 2017;**8**:14156. <https://doi.org/10.1038/ncomms14156>.
- 600 66. Flick RE, Murray JF, Ewing LC. *Trends in United States Tidal Datum Statistics and Tide*  
601 *Range: A Data Report Atlas*. Scripps Institution of Oceanography (SIO) Reference Series  
602 99-20. 1999:1–213.
- 603 67. Kirwan ML, Guntenspergen GR. Influence of tidal range on the stability of coastal  
604 marshland. *J Geophys Res Earth Surf* 2010;**115**. <https://doi.org/10.1029/2009jf001400>.
- 605 68. Snedden GA, Cretini K, Patton B. Inundation and salinity impacts to above- and  
606 belowground productivity in *Spartina patens* and *Spartina alterniflora* in the Mississippi  
607 River deltaic plain: Implications for using river diversions as restoration tools. *Ecol Eng*  
608 2014;**81**:133–9. <https://doi.org/10.1016/j.ecoleng.2015.04.035>.
- 609 69. Watson EB, Wigand C, Davey EW, Andrews HM, Bishop J, Raposa KB. Wetland Loss  
610 Patterns and Inundation-Productivity Relationships Prognosticate Widespread Salt Marsh  
611 Loss for Southern New England. *Estuaries and Coasts* 2016;**40**:662–681.  
612 <https://doi.org/10.1007/s12237-016-0069-1>.
- 613 70. Payne AR, Burdick DM, Moore GE. Potential Effects of Sea-Level Rise on Salt Marsh  
614 Elevation Dynamics in a New Hampshire Estuary. *Estuaries and Coasts* 2019:1405–18.  
615 <https://doi.org/10.1007/s12237-019-00589-z>.

616

## 617 **Supporting Information**

618 **S1 Table. Data collected for calculation of empirical tidal datums.**

619 **S2 Table. Tidal datums calculated from 2000–2018.**

620 **S3 Table. Tidal datums calculated for the National Tidal Datum Epoch (1983–2001).**



621 **S4 Table. Tidal datums from NOAA Vdatum.**

622 **S5 Table. Error between NTDE datum and Vdatum (%).**

623 **S6 Table. Values of accretion, surface elevation change, shallow subsidence, and**  
624 **comparisons to long-term (LT; 1969–2018) local sea level rise (LSLR), short-**  
625 **term (ST; 2000–2018) LSLR, and mean high water rise (MHWR; 2000–**  
626 **2018)(see Table 4 for those rate values).**

627 Standard errors are in parenthesis. To be conservative, when rates of accretion or  
628 elevation change exceeded water level rise rates (LT LSLR, ST LSLR, or MHWR) by  
629 at least one standard error, we assigned it *yes* (bold Y, boxes gray shaded) for keeping  
630 pace; otherwise, we assigned it *no* (N) for not keeping pace.

631 **Fig S1. Trends of elevation change at Dinner Point Creek SET 1 before and after it was**  
632 **abruptly buried with sediment as part of the adjacent construction of a mosquito**  
633 **control pond (i.e. OMWM).**

634 Between 2011 and 2013, marsh elevation increased at a rate of 4.92 mm y<sup>-1</sup>; 2013 to  
635 the present, elevation decreased at a rate of 13.5 mm y<sup>-1</sup>. Error bars are standard error.

636

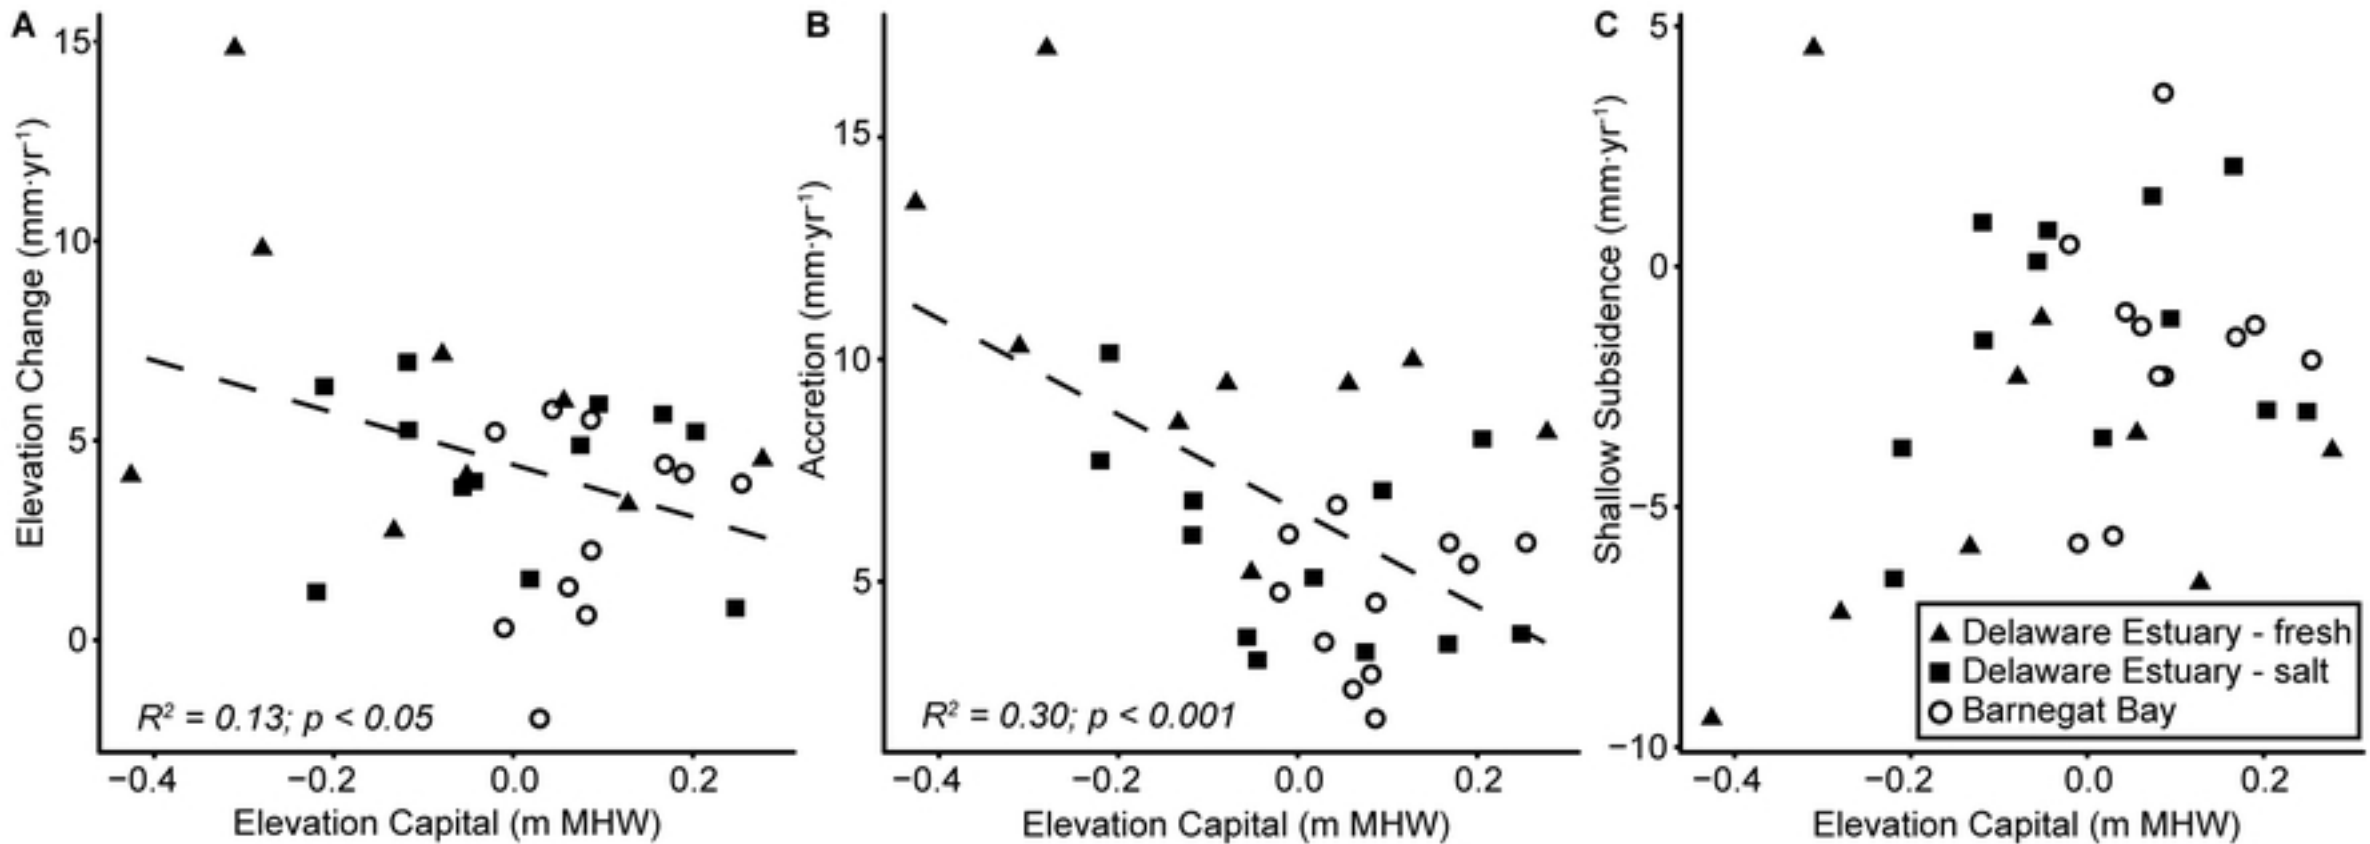

Figure

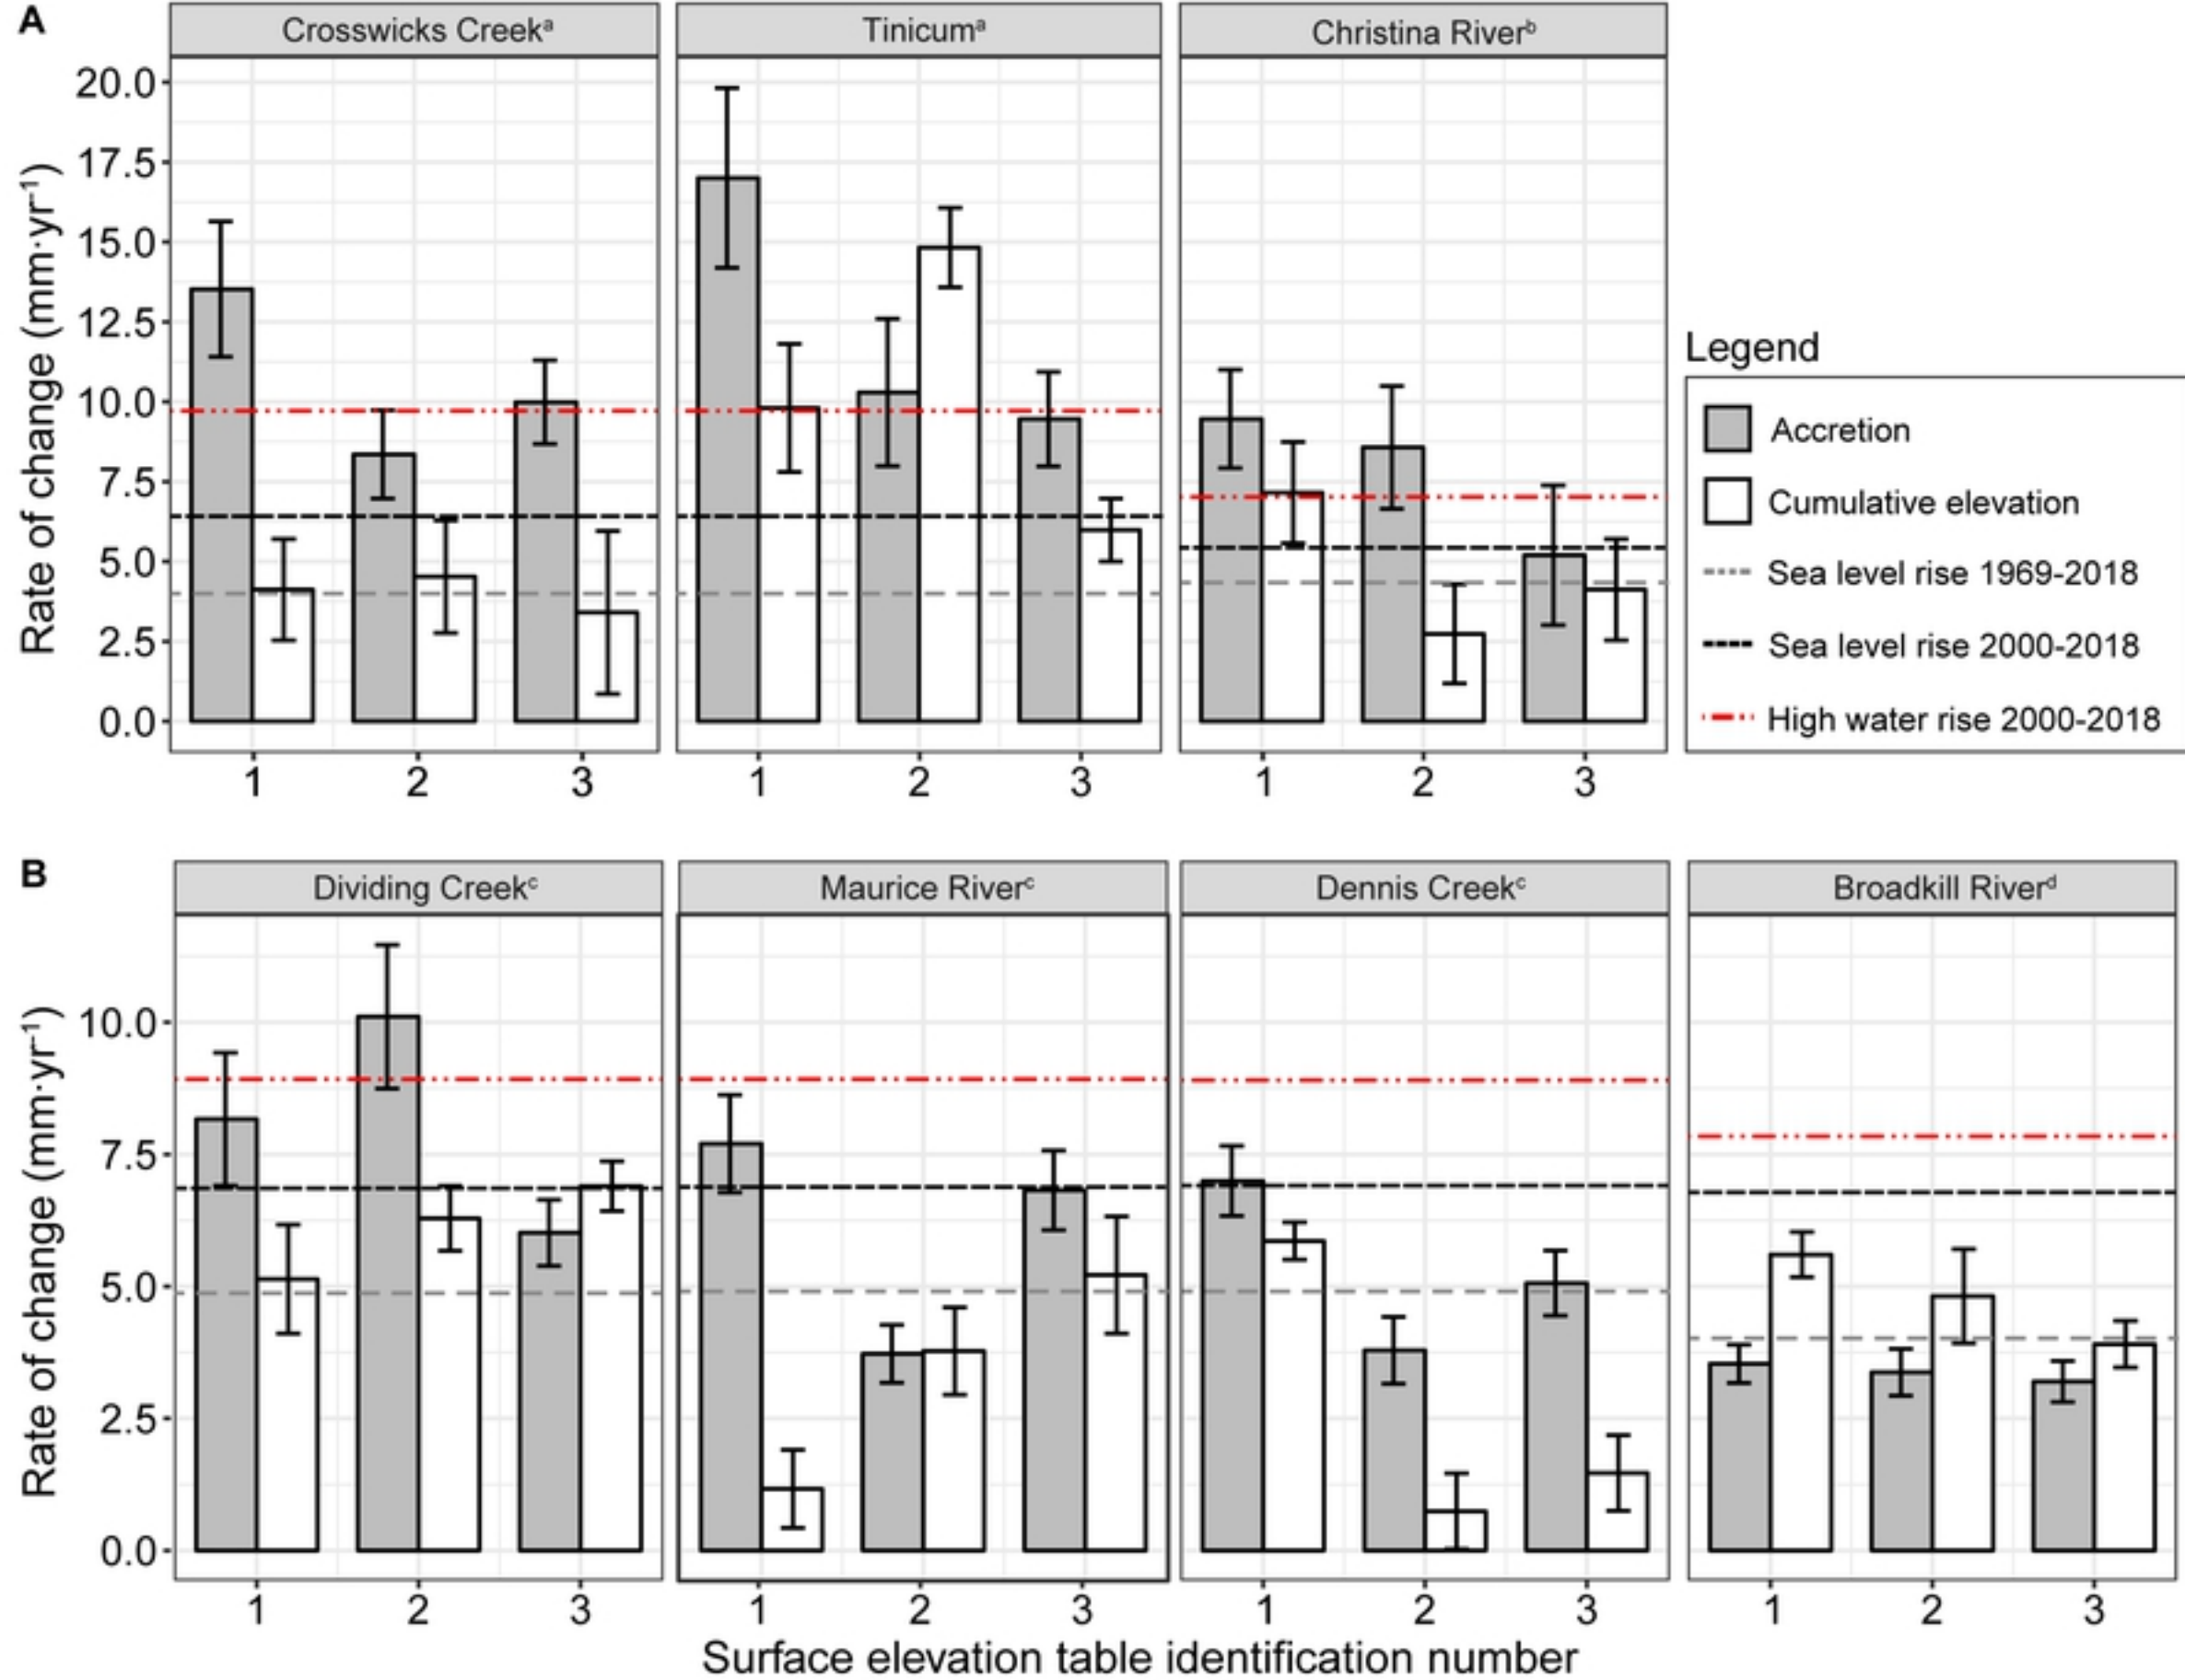

Figure

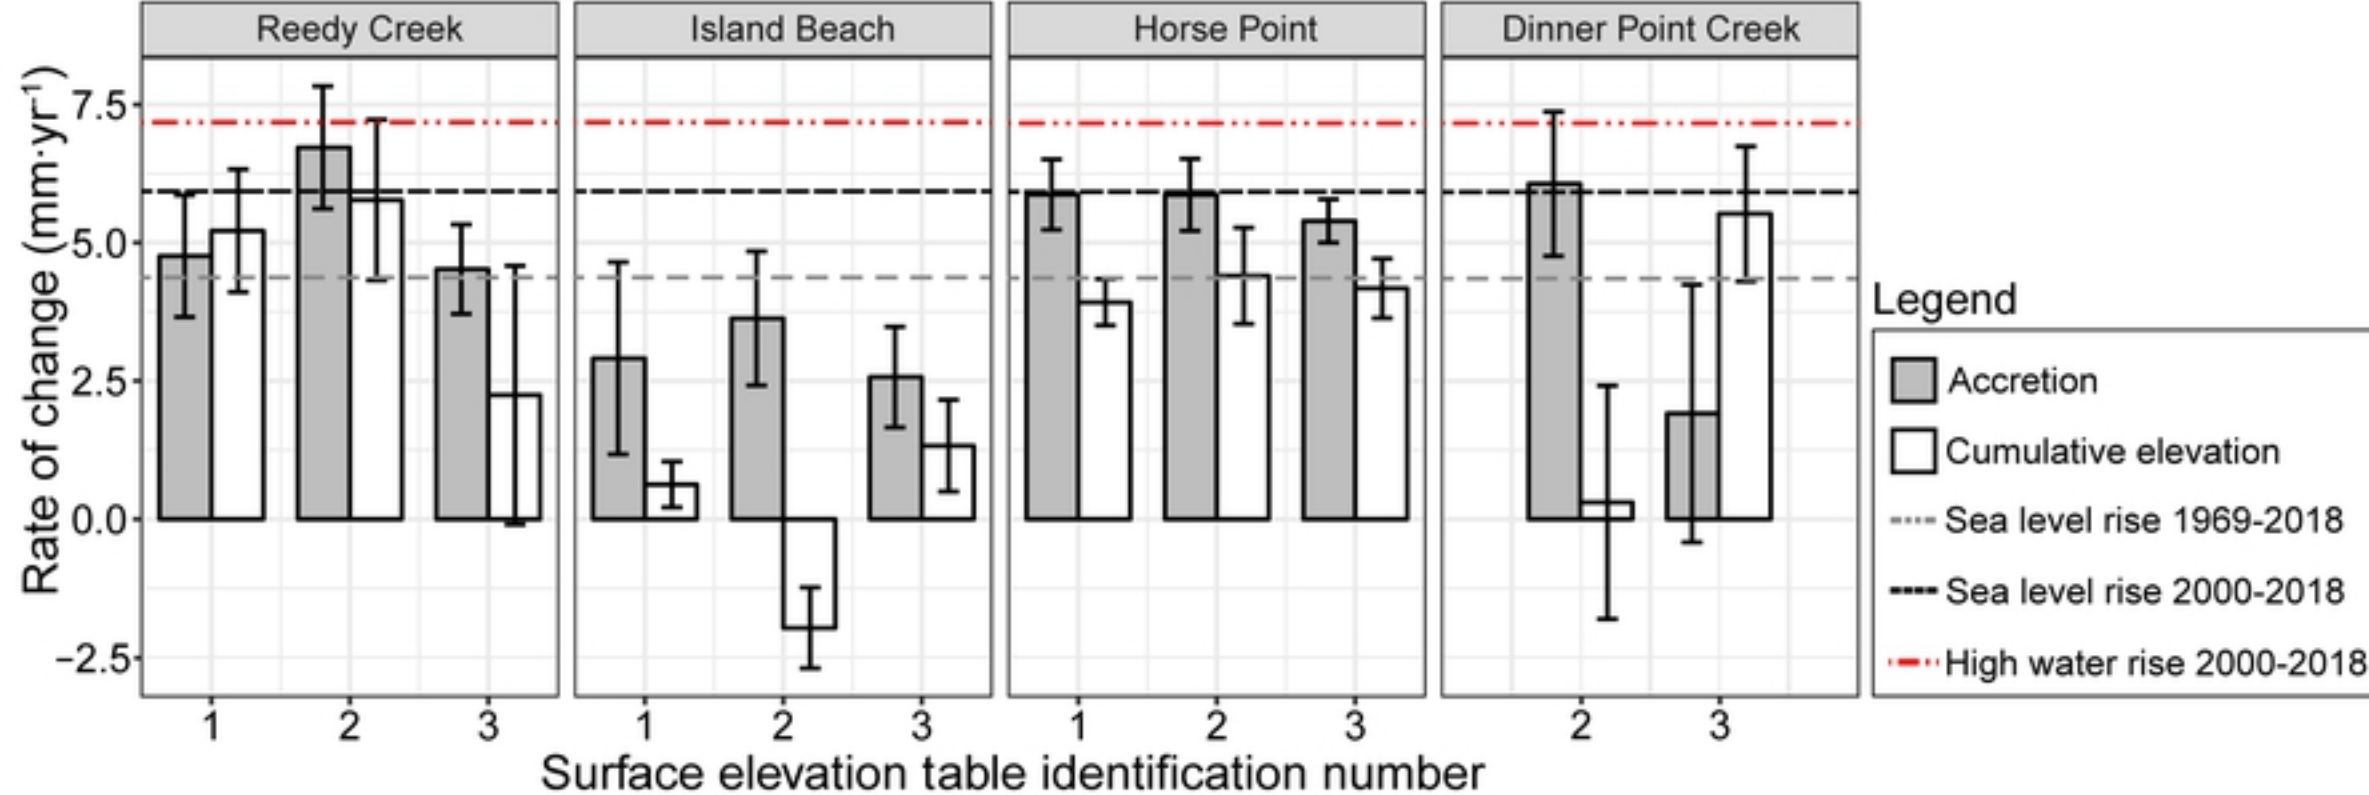

Figure

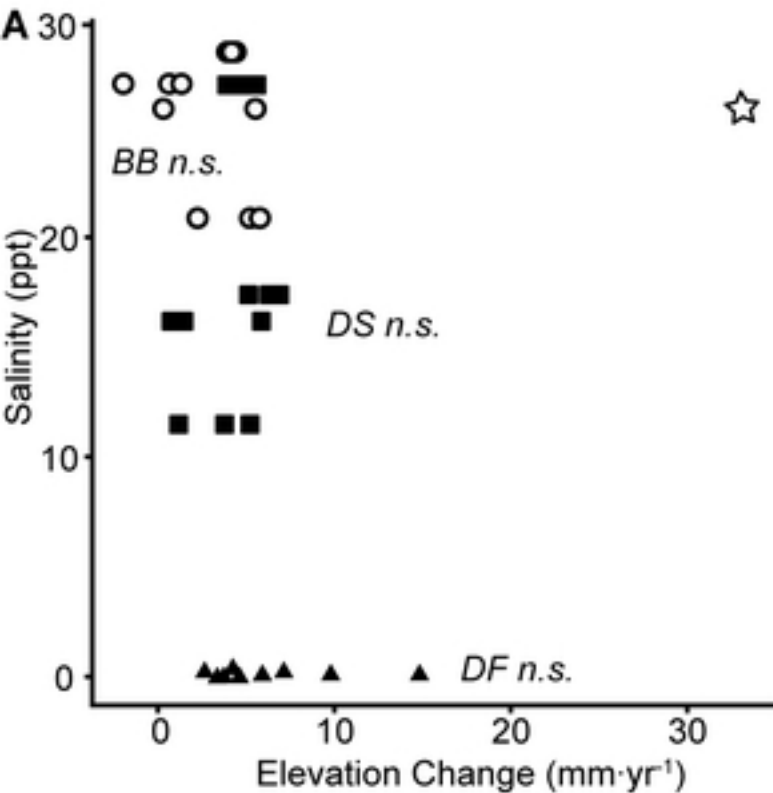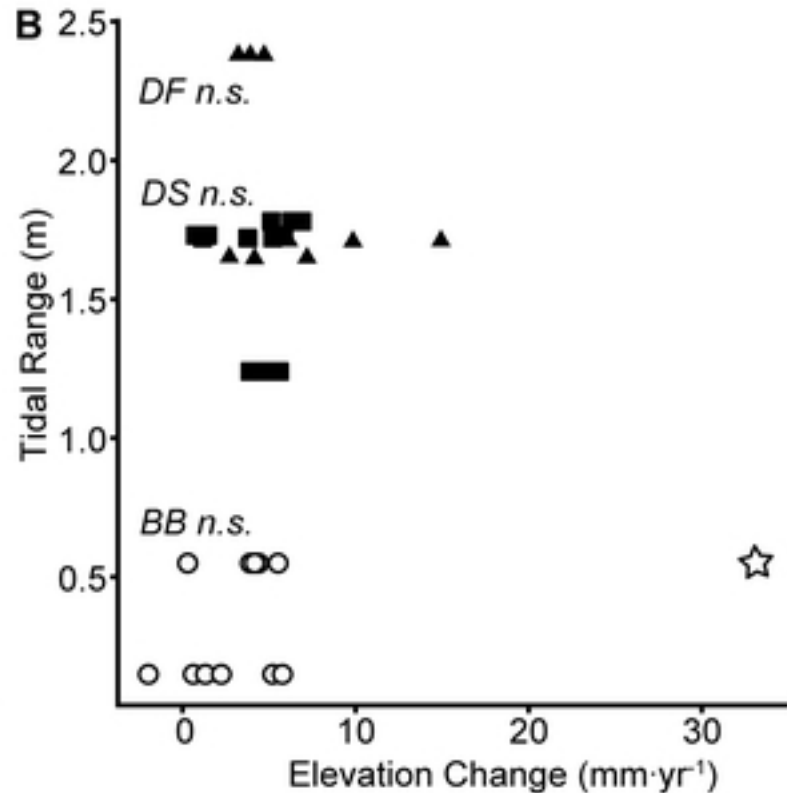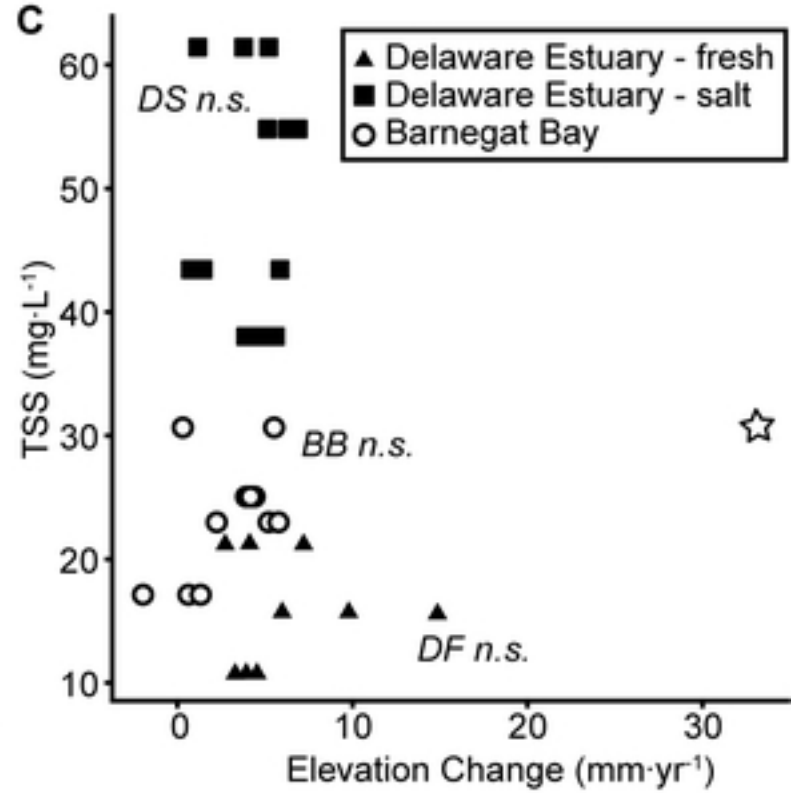

Figure

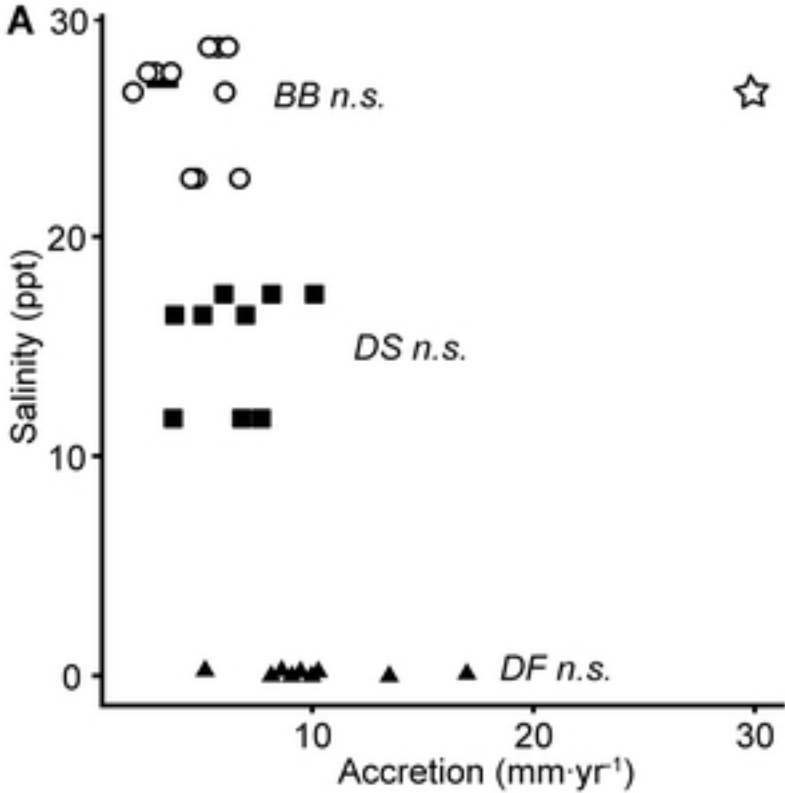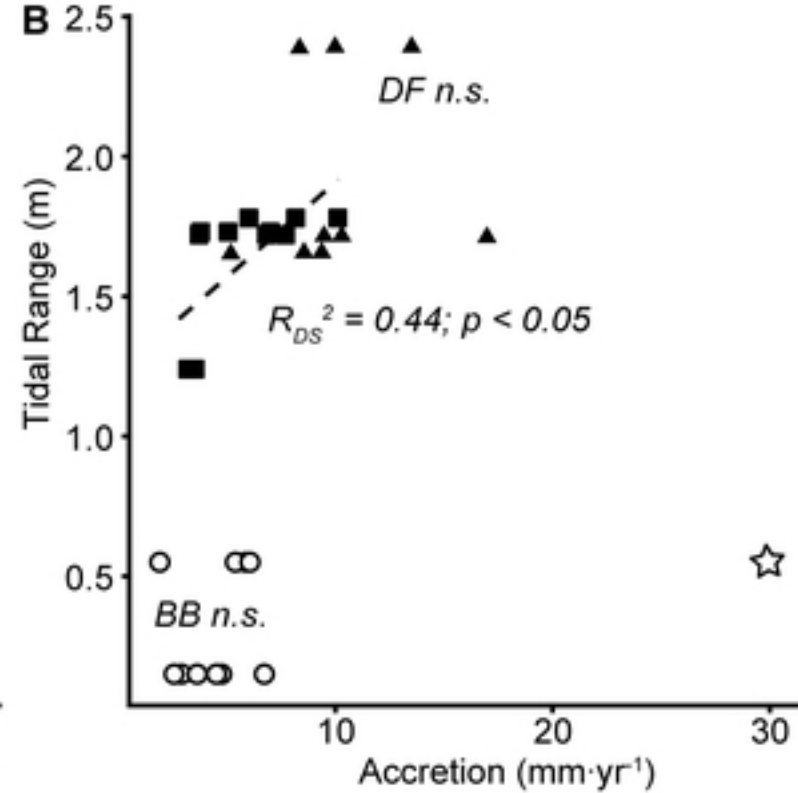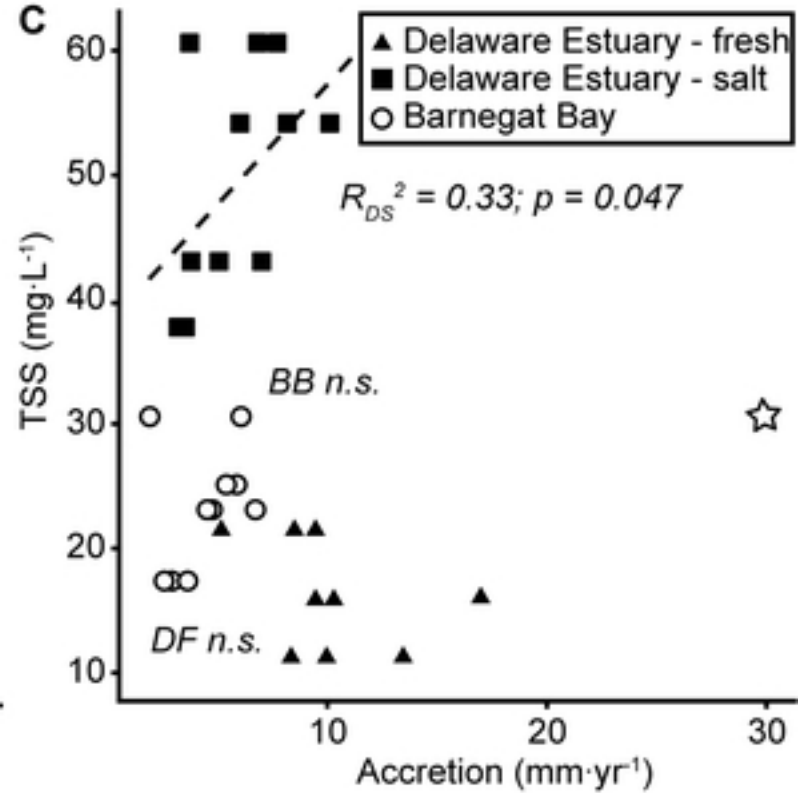

Figure

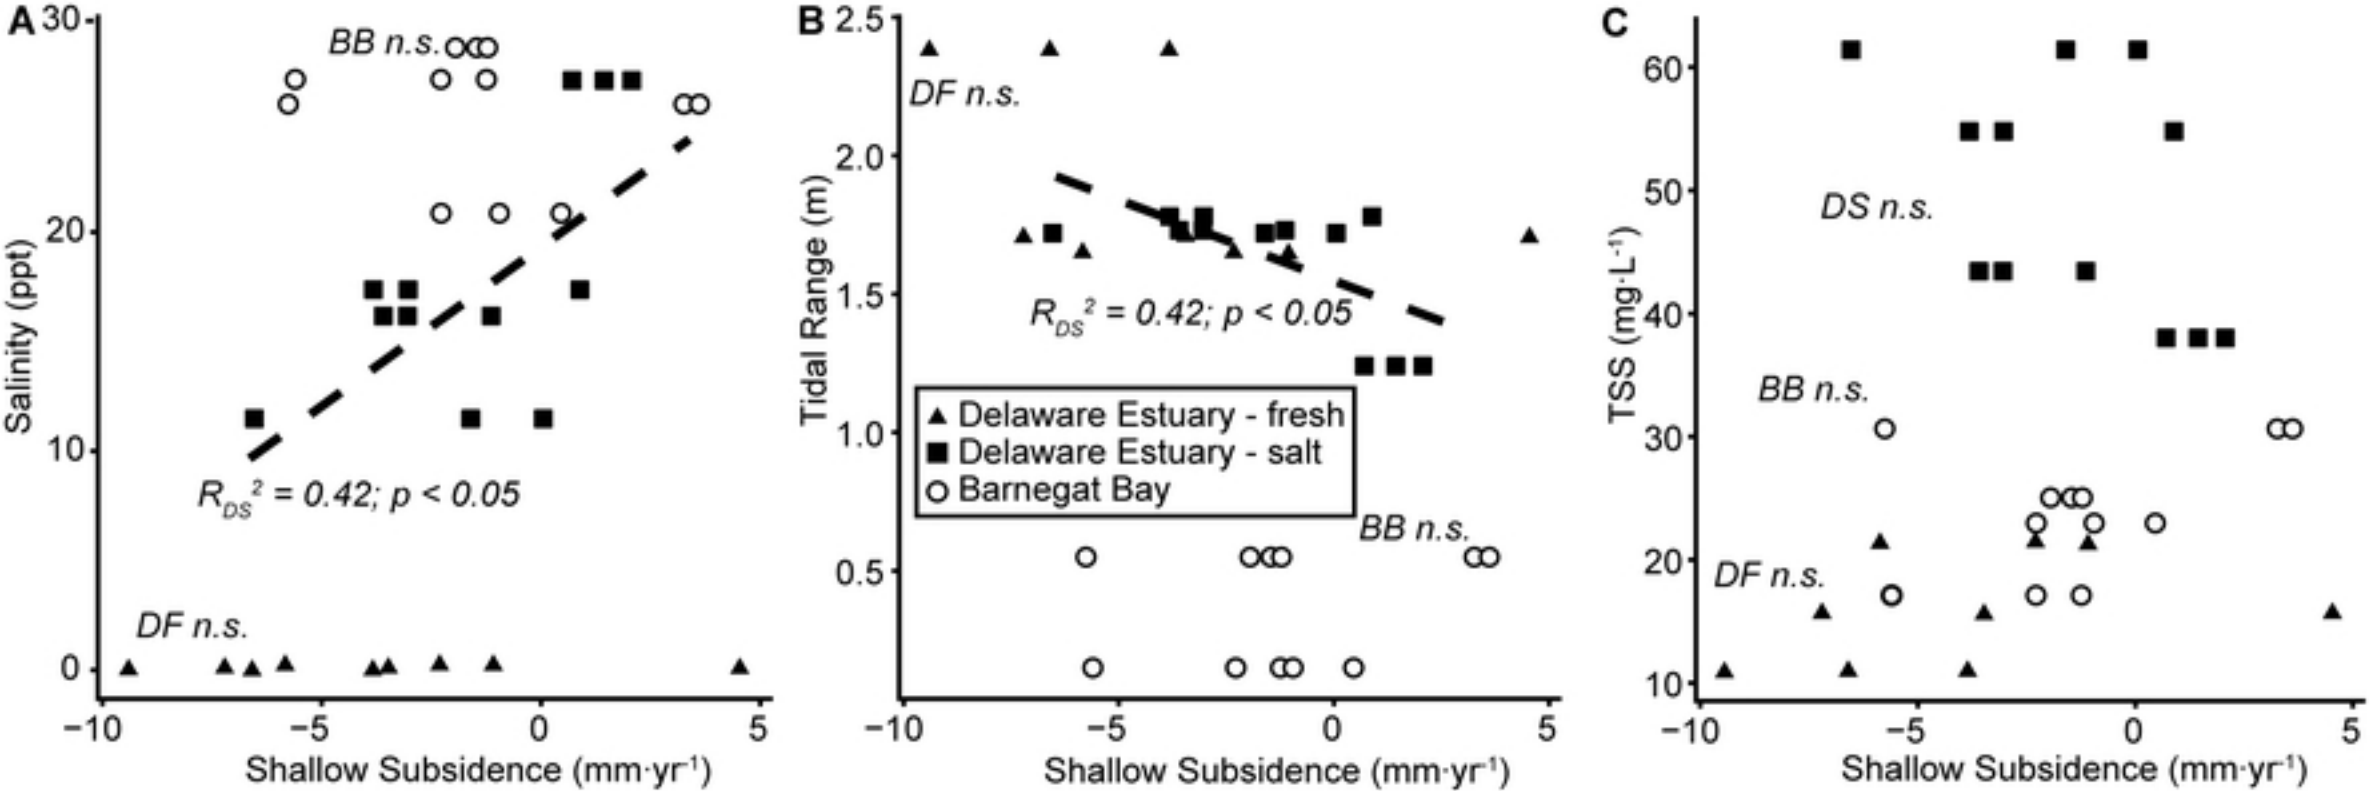

Figure

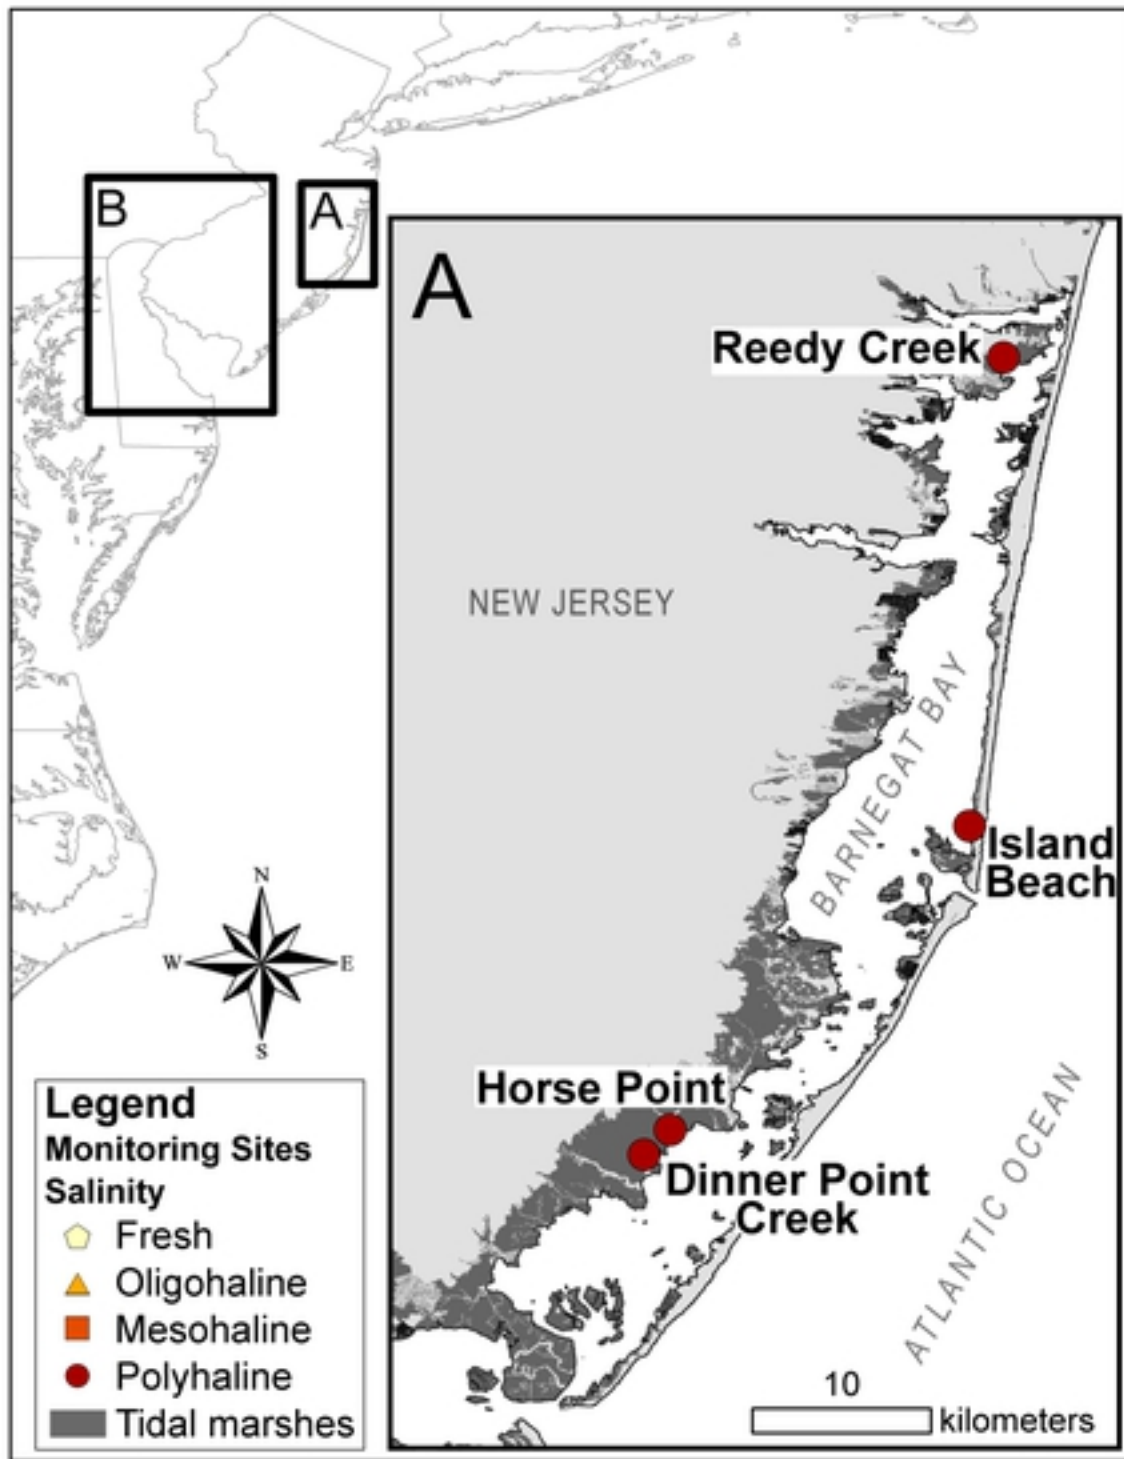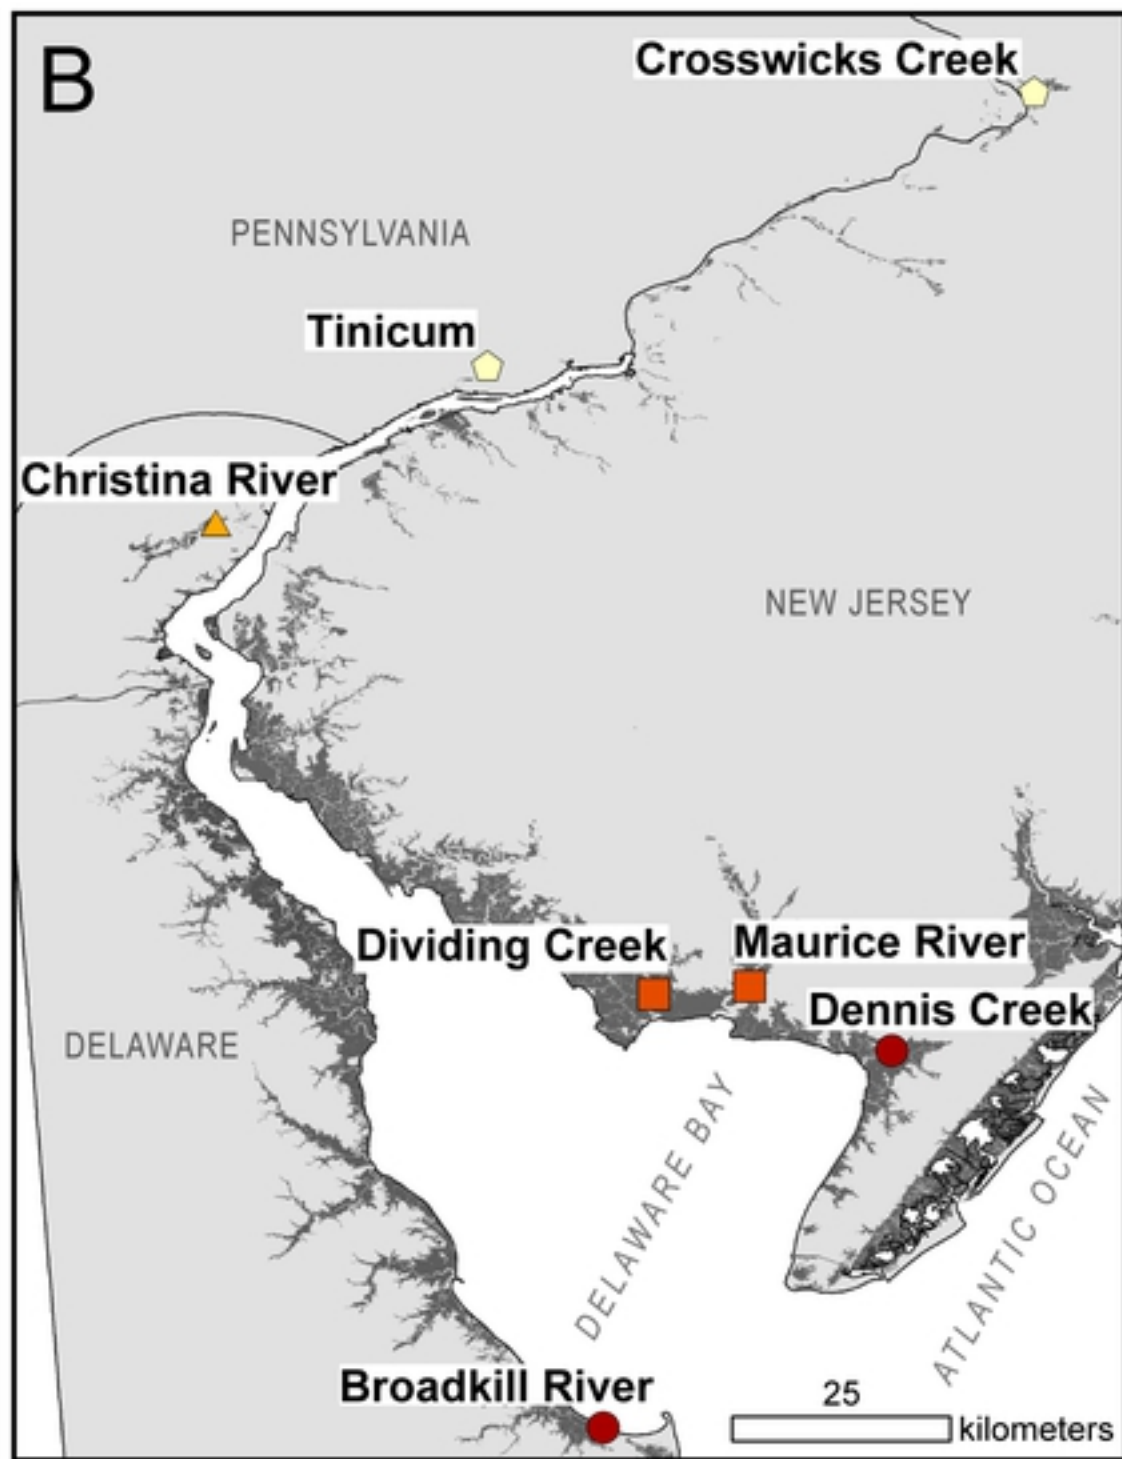

Figure



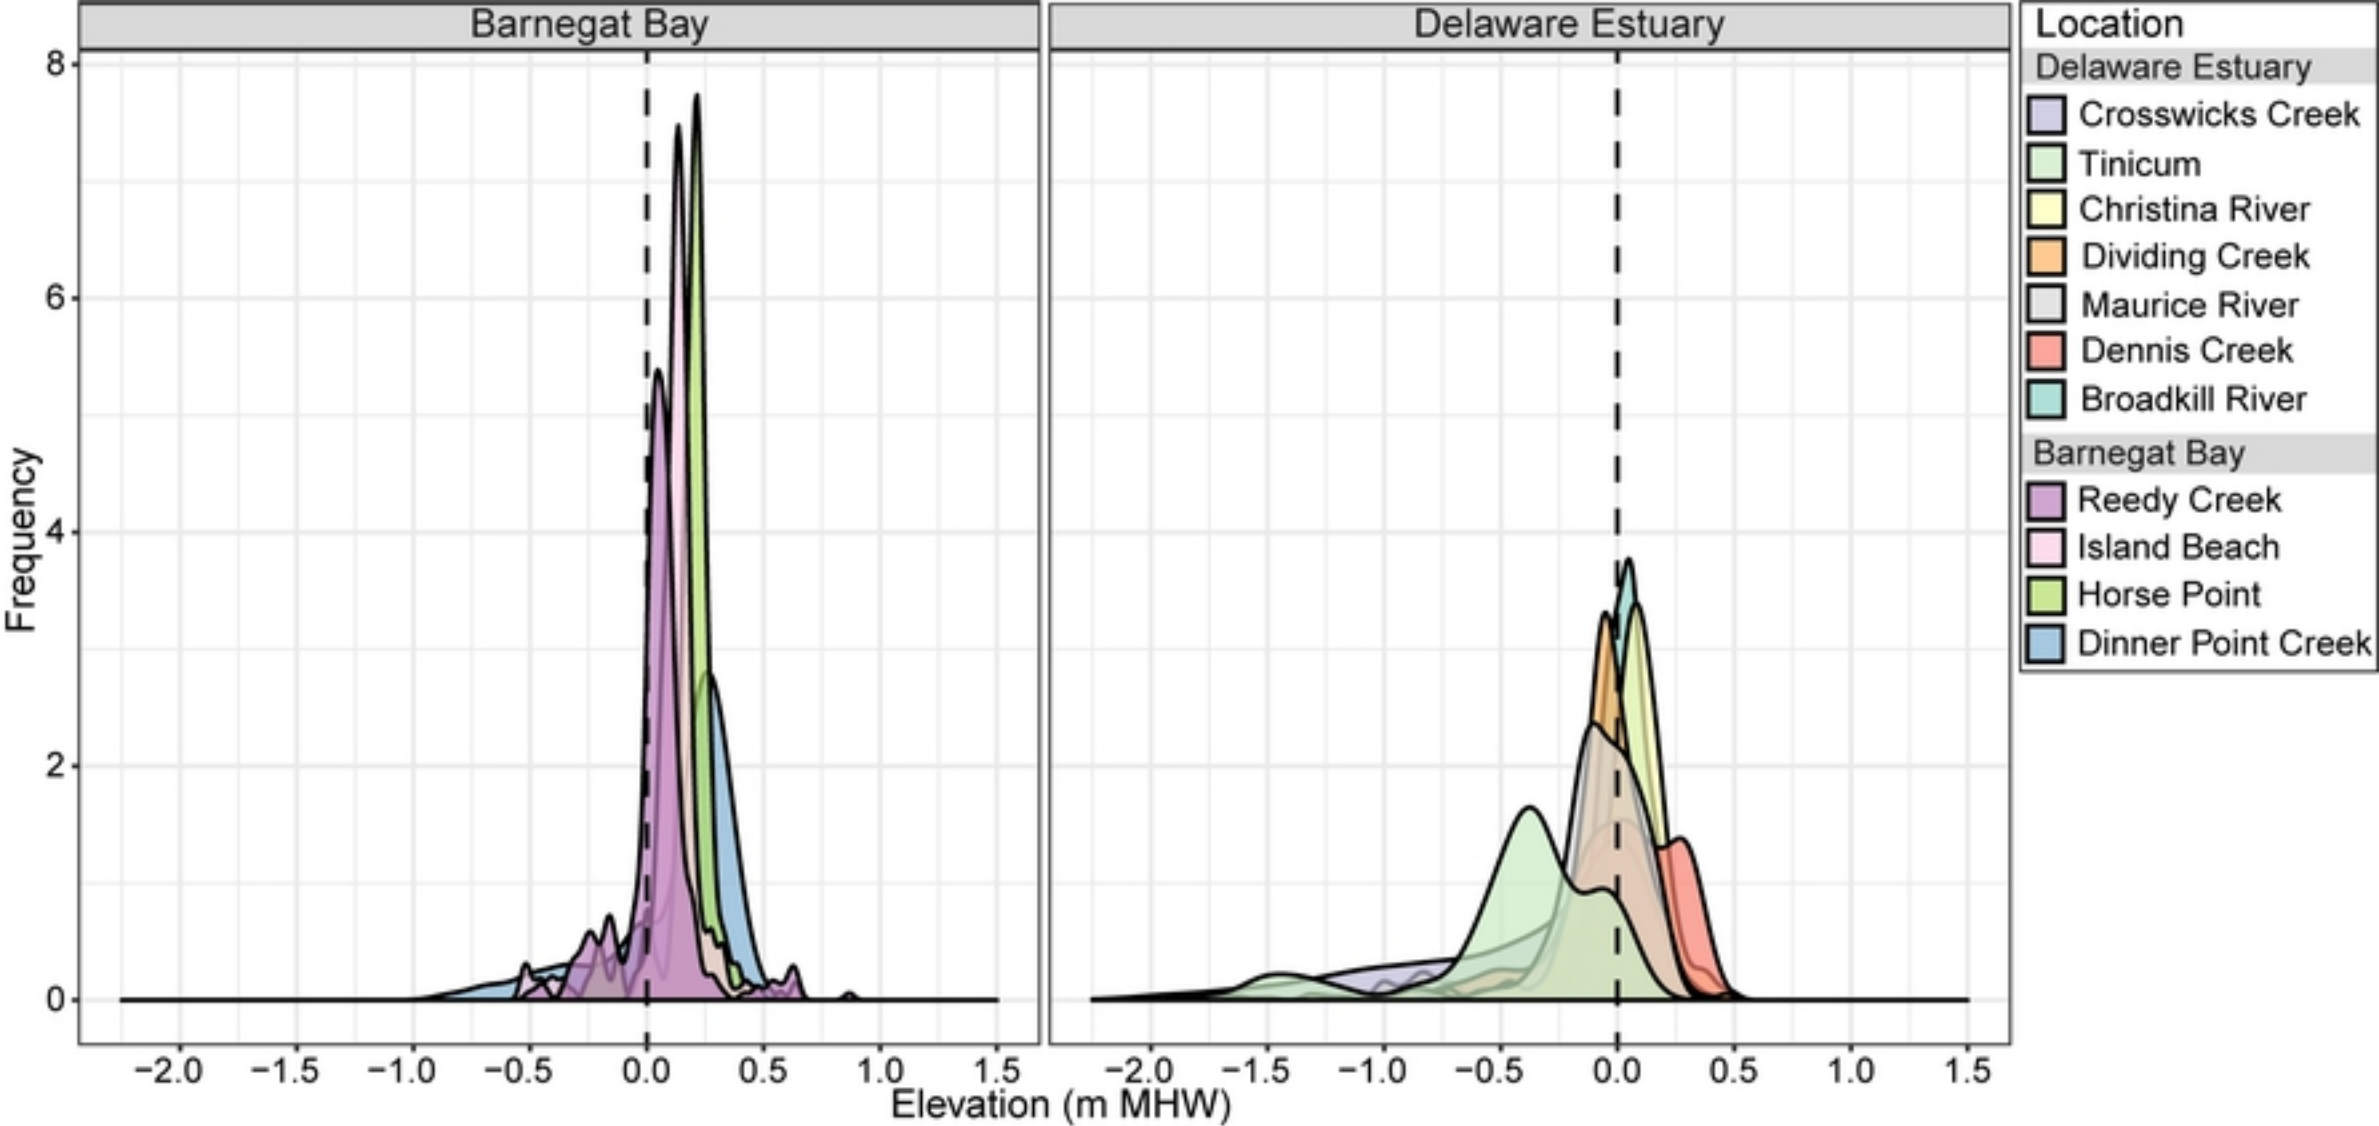

Figure
